# Supplementary material
Source: PubMed Central journal article supplement (PMC7306003)

## Compound characterization data. (Related to Figure 3 and STAR Methods)

Detection of indolokine A5 (3), its methyl ester (ITE), and ethyl ester from *E. coli* BW25113 cultures extracted with different solvent conditions.

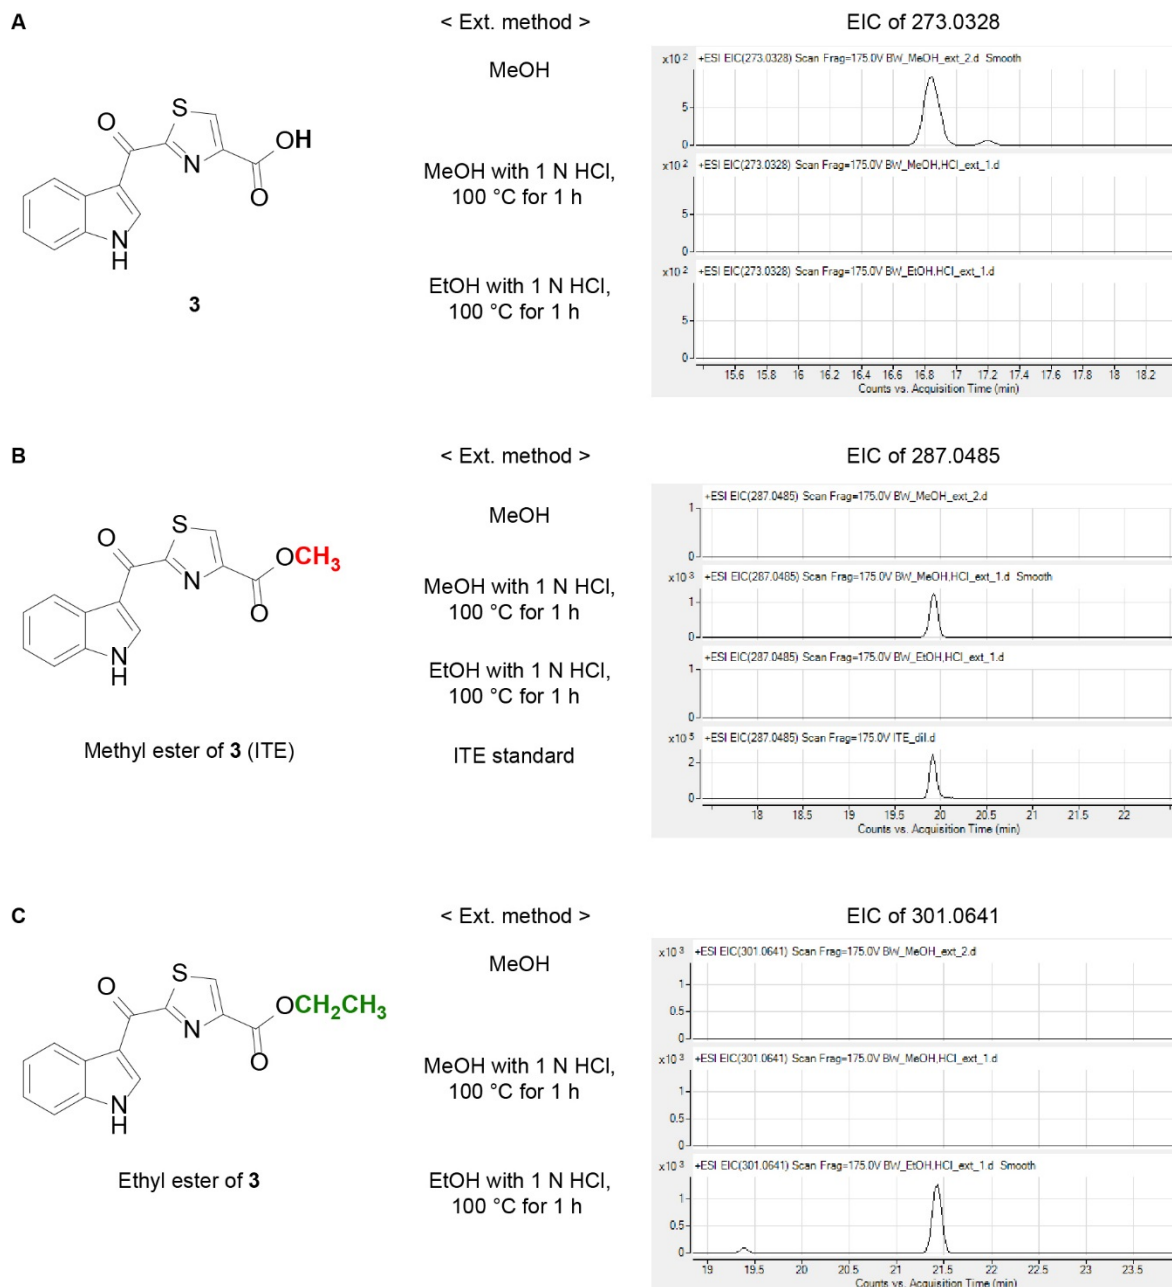

$^1\text{H}$  NMR, 600 MHz,  $\text{DMSO-}d_6$

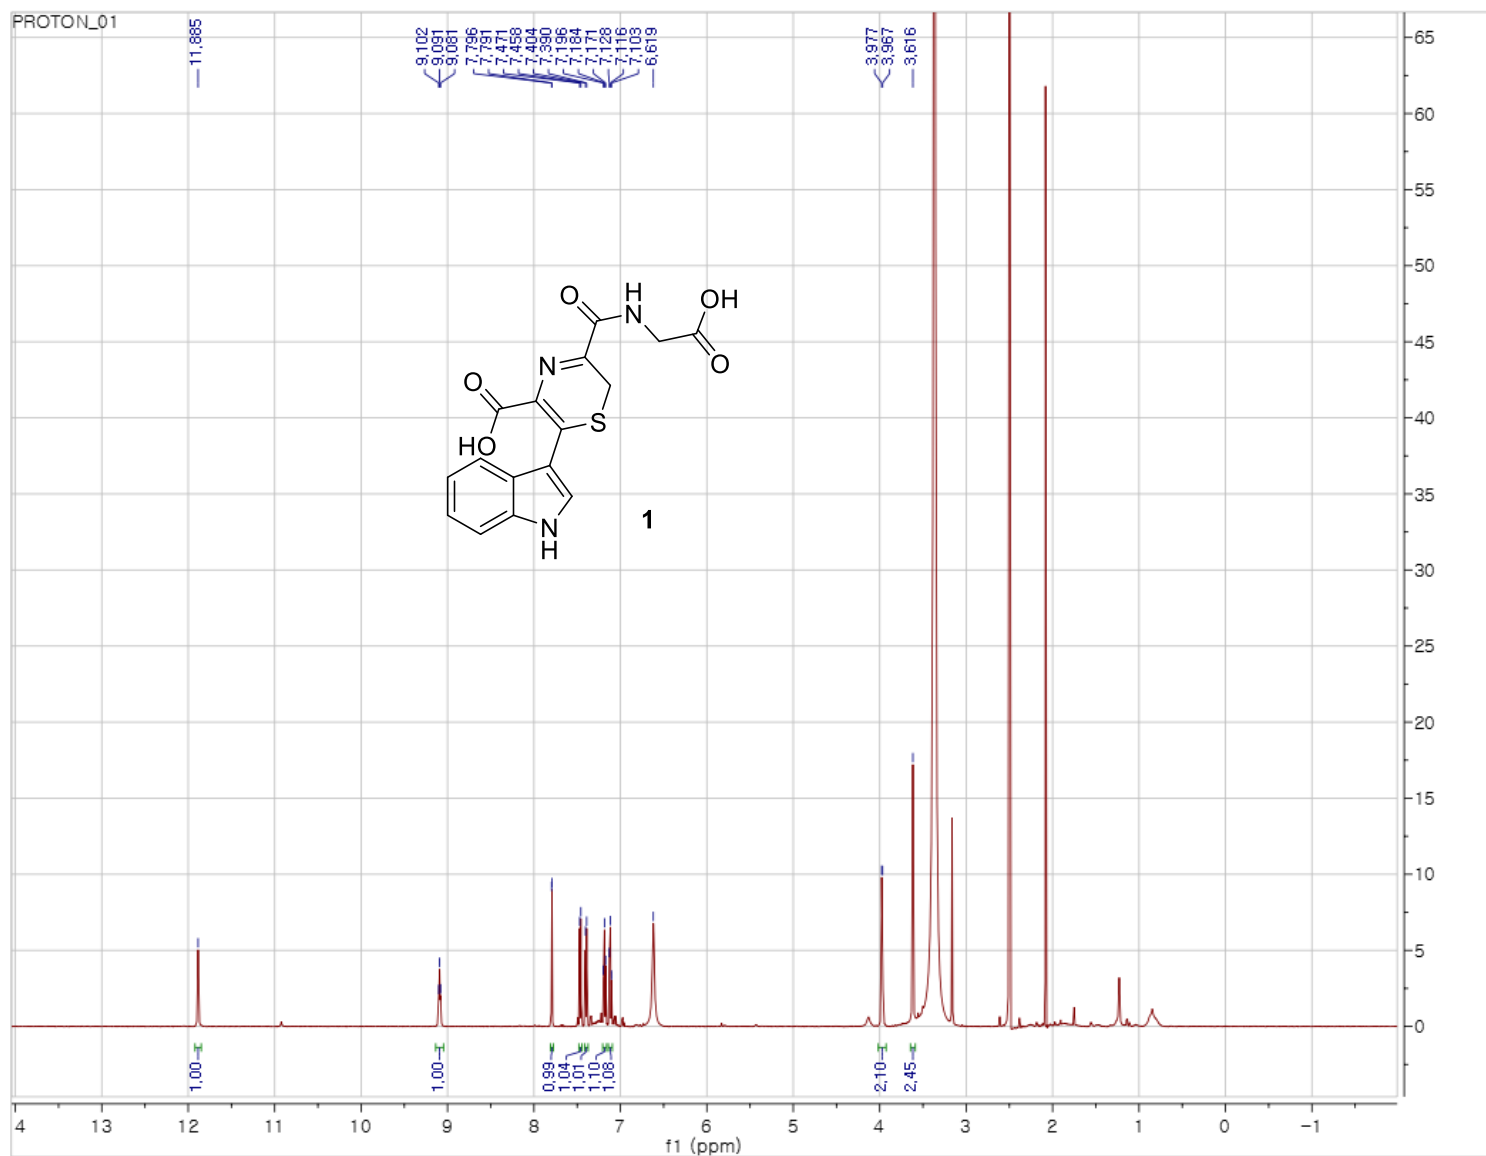

$^{13}\text{C}$  NMR, 150 MHz,  $\text{DMSO-}d_6$

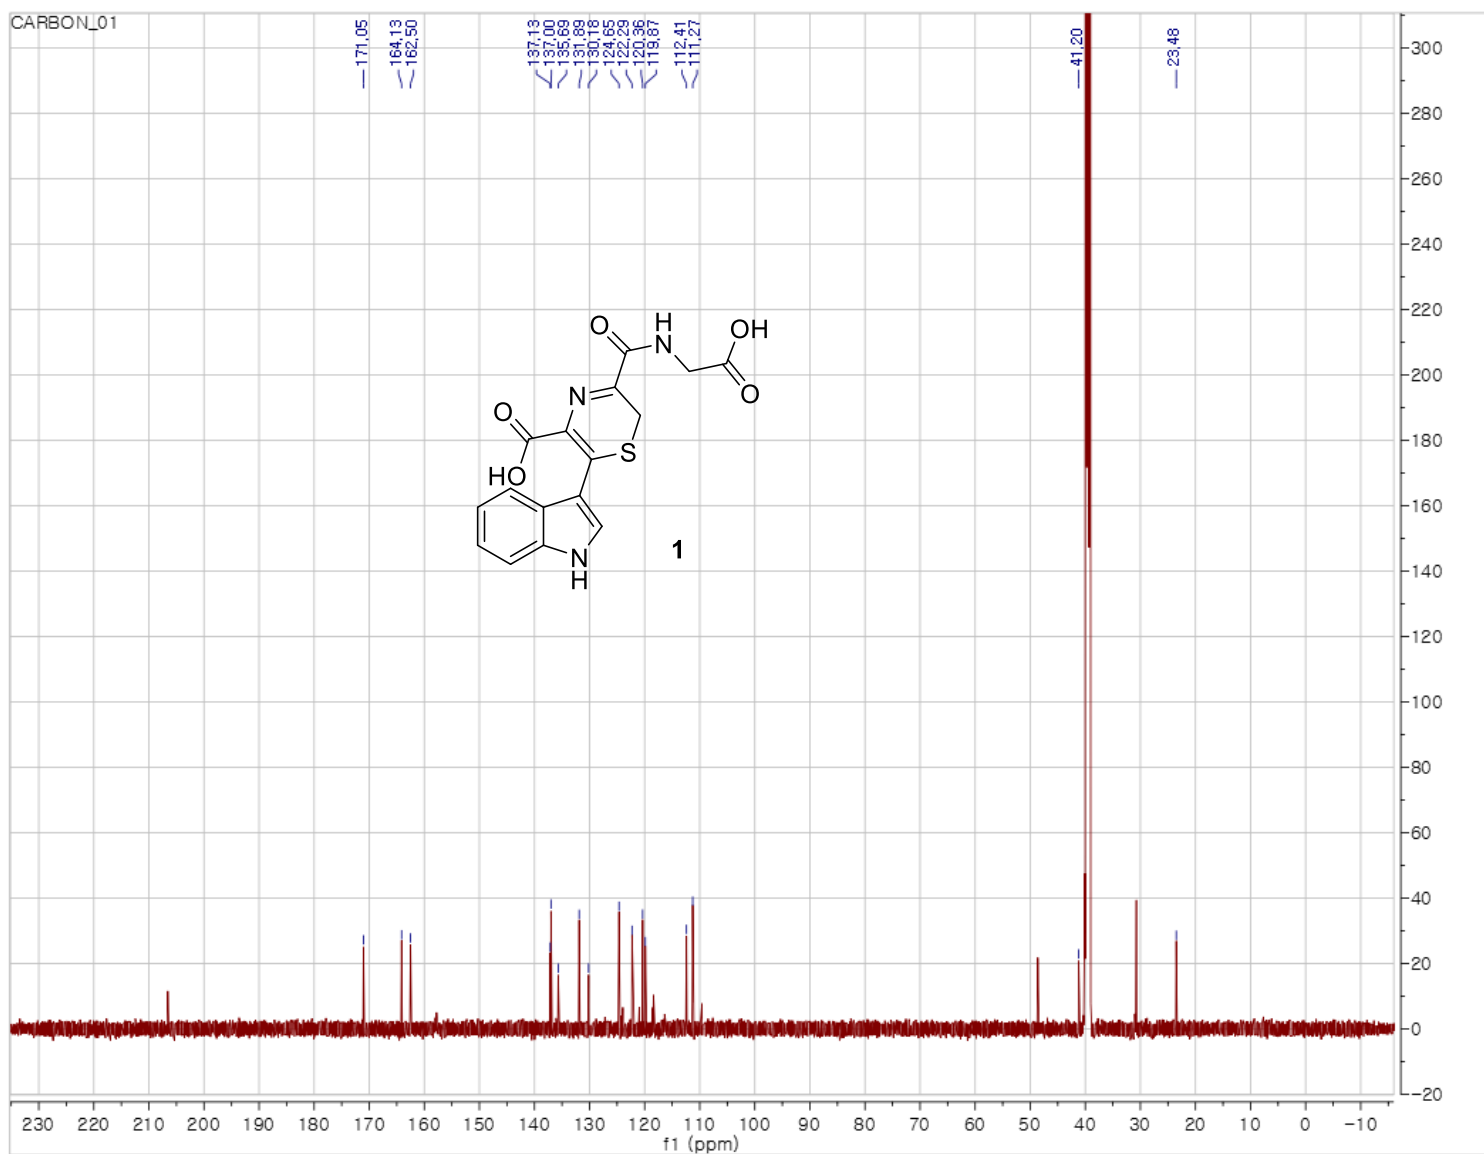

$^1\text{H}$ - $^1\text{H}$  gCOSY, 600 MHz, DMSO- $d_6$

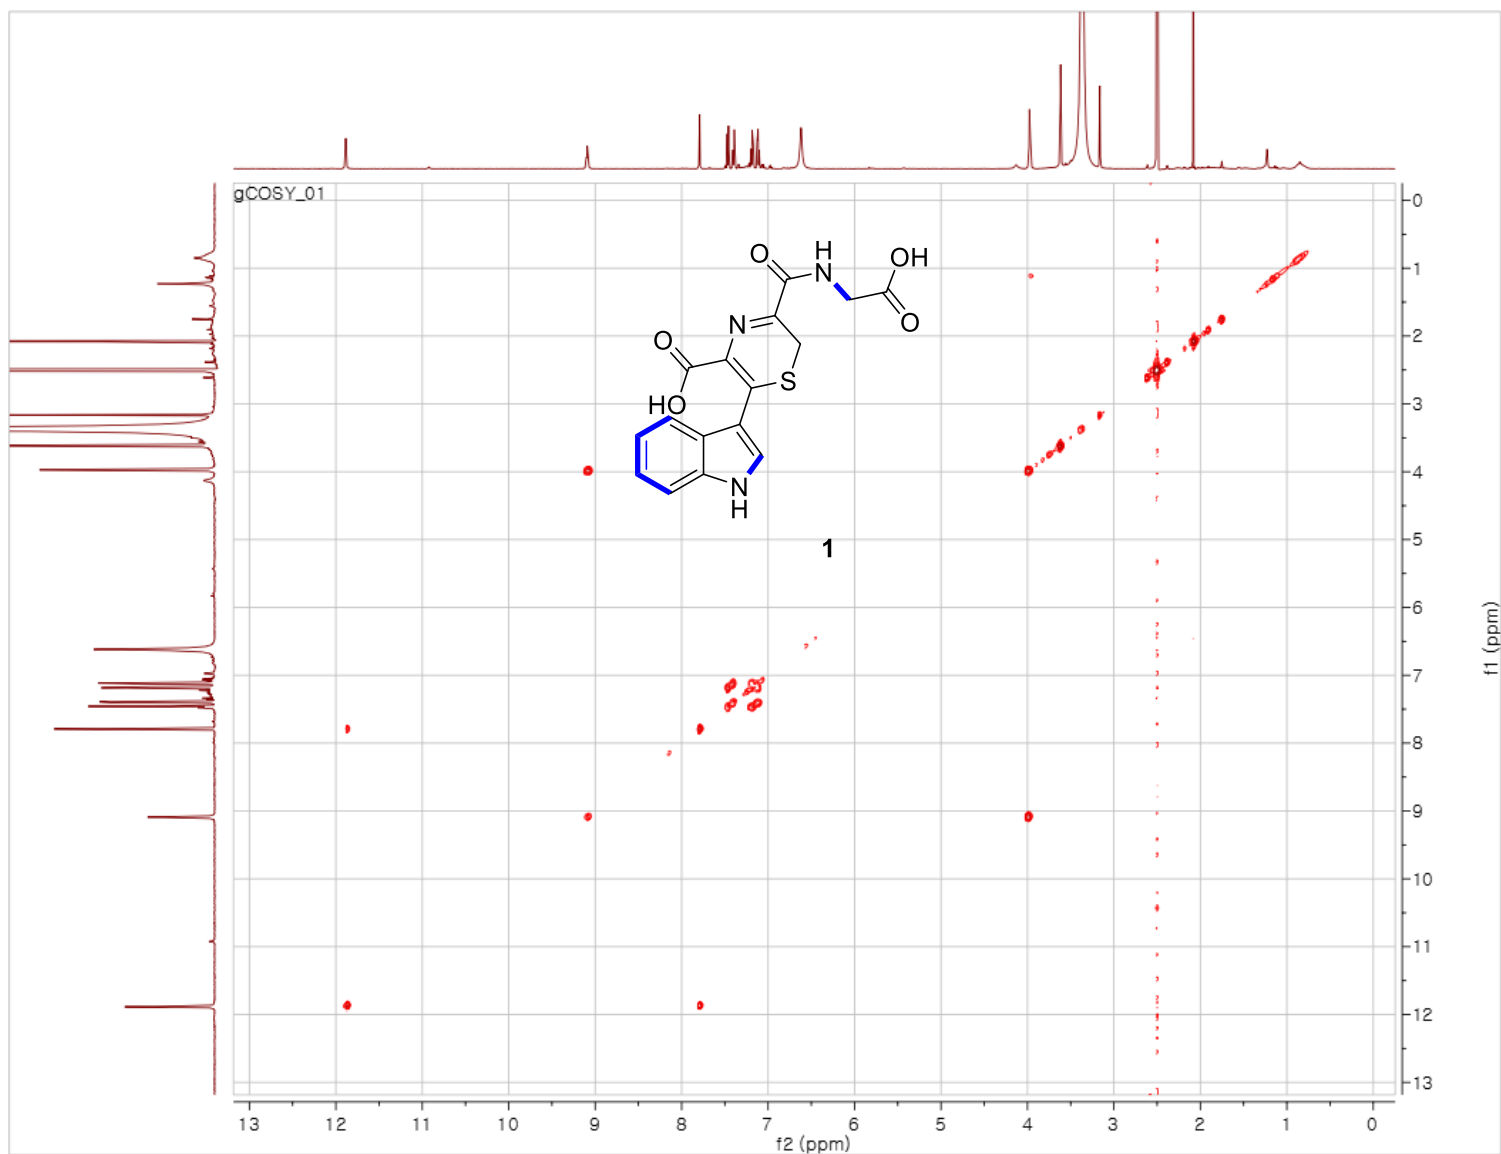

$^1\text{H}$ - $^{13}\text{C}$  gHSQCAD, 600 MHz,  $\text{DMSO-}d_6$

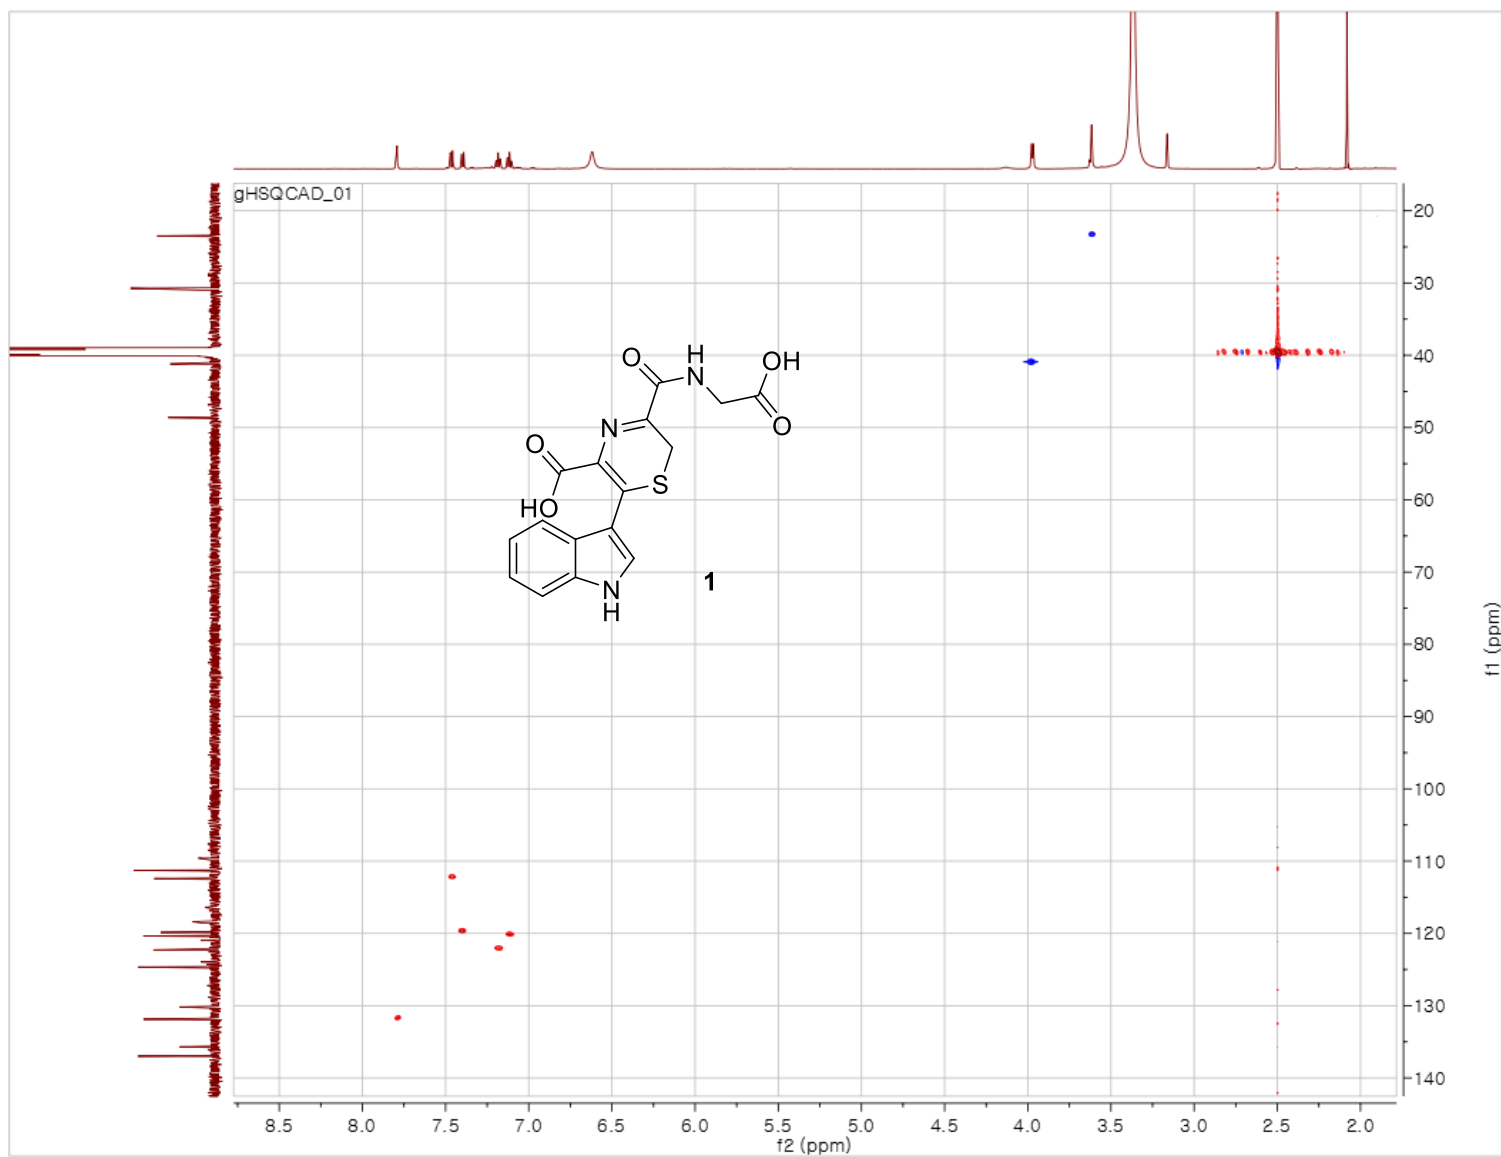

$^1\text{H}$ - $^{13}\text{C}$  gHMBCAD, 600 MHz,  $\text{DMSO-}d_6$

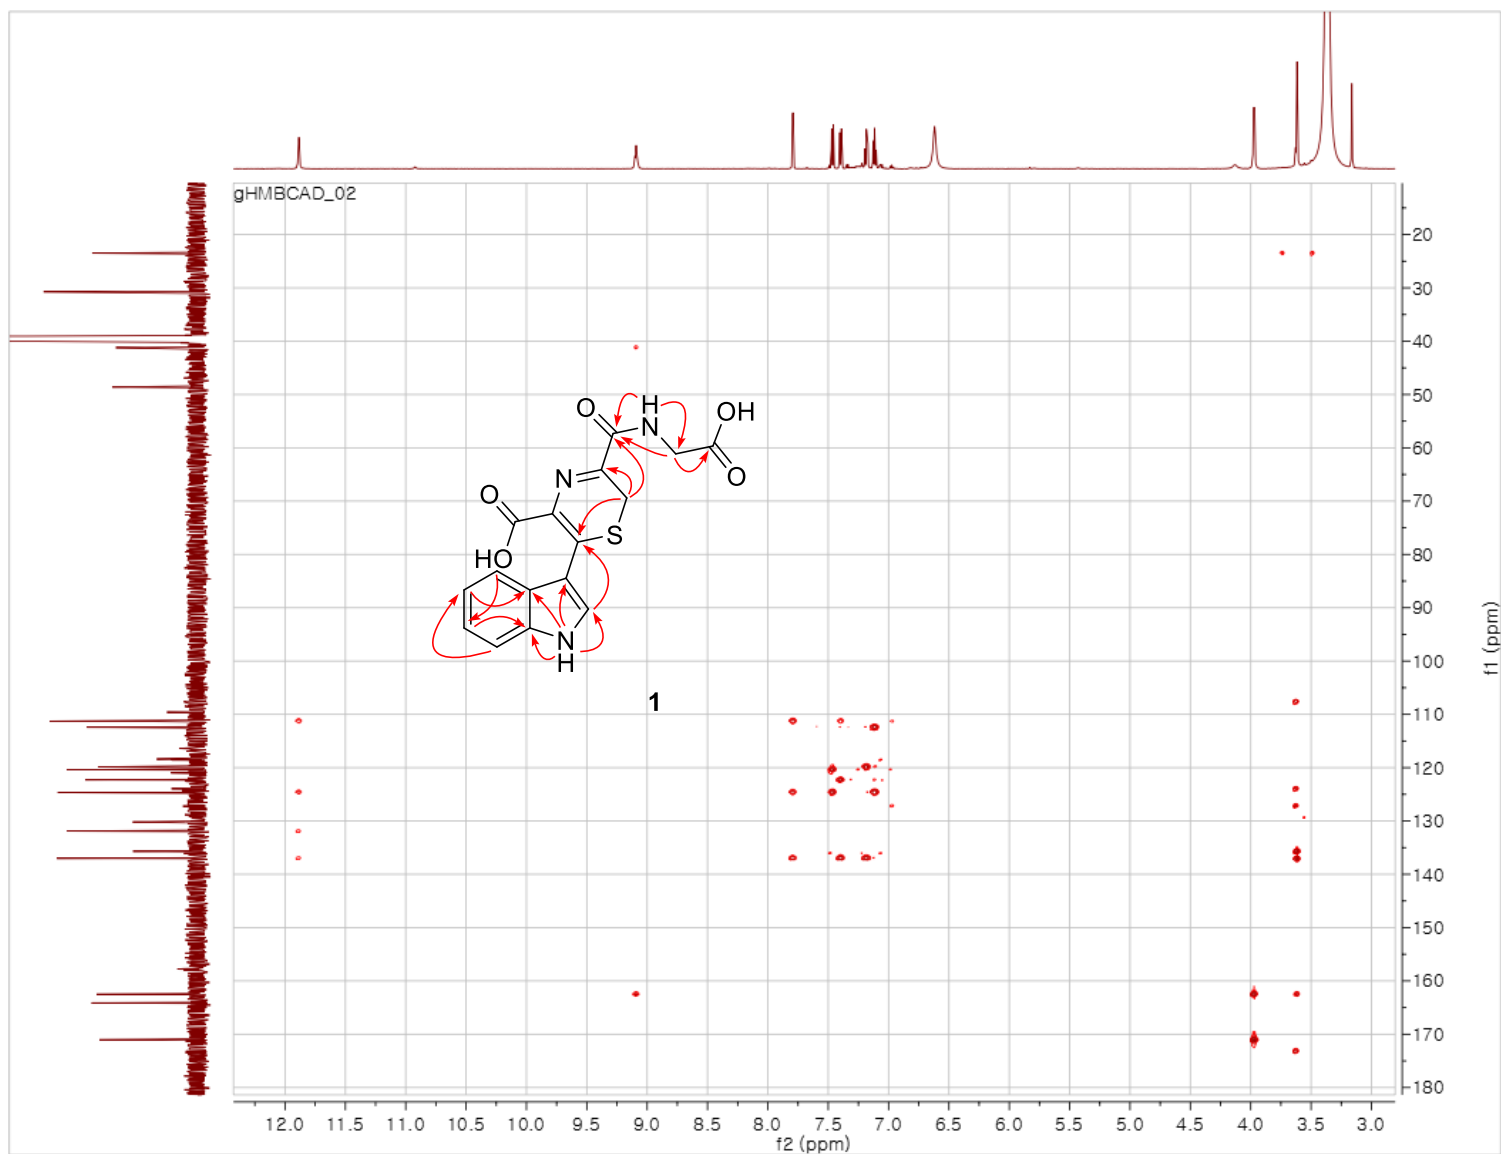

$^1\text{H}$ - $^{13}\text{C}$  LR-HSQMBC, 600 MHz,  $\text{DMSO-}d_6$

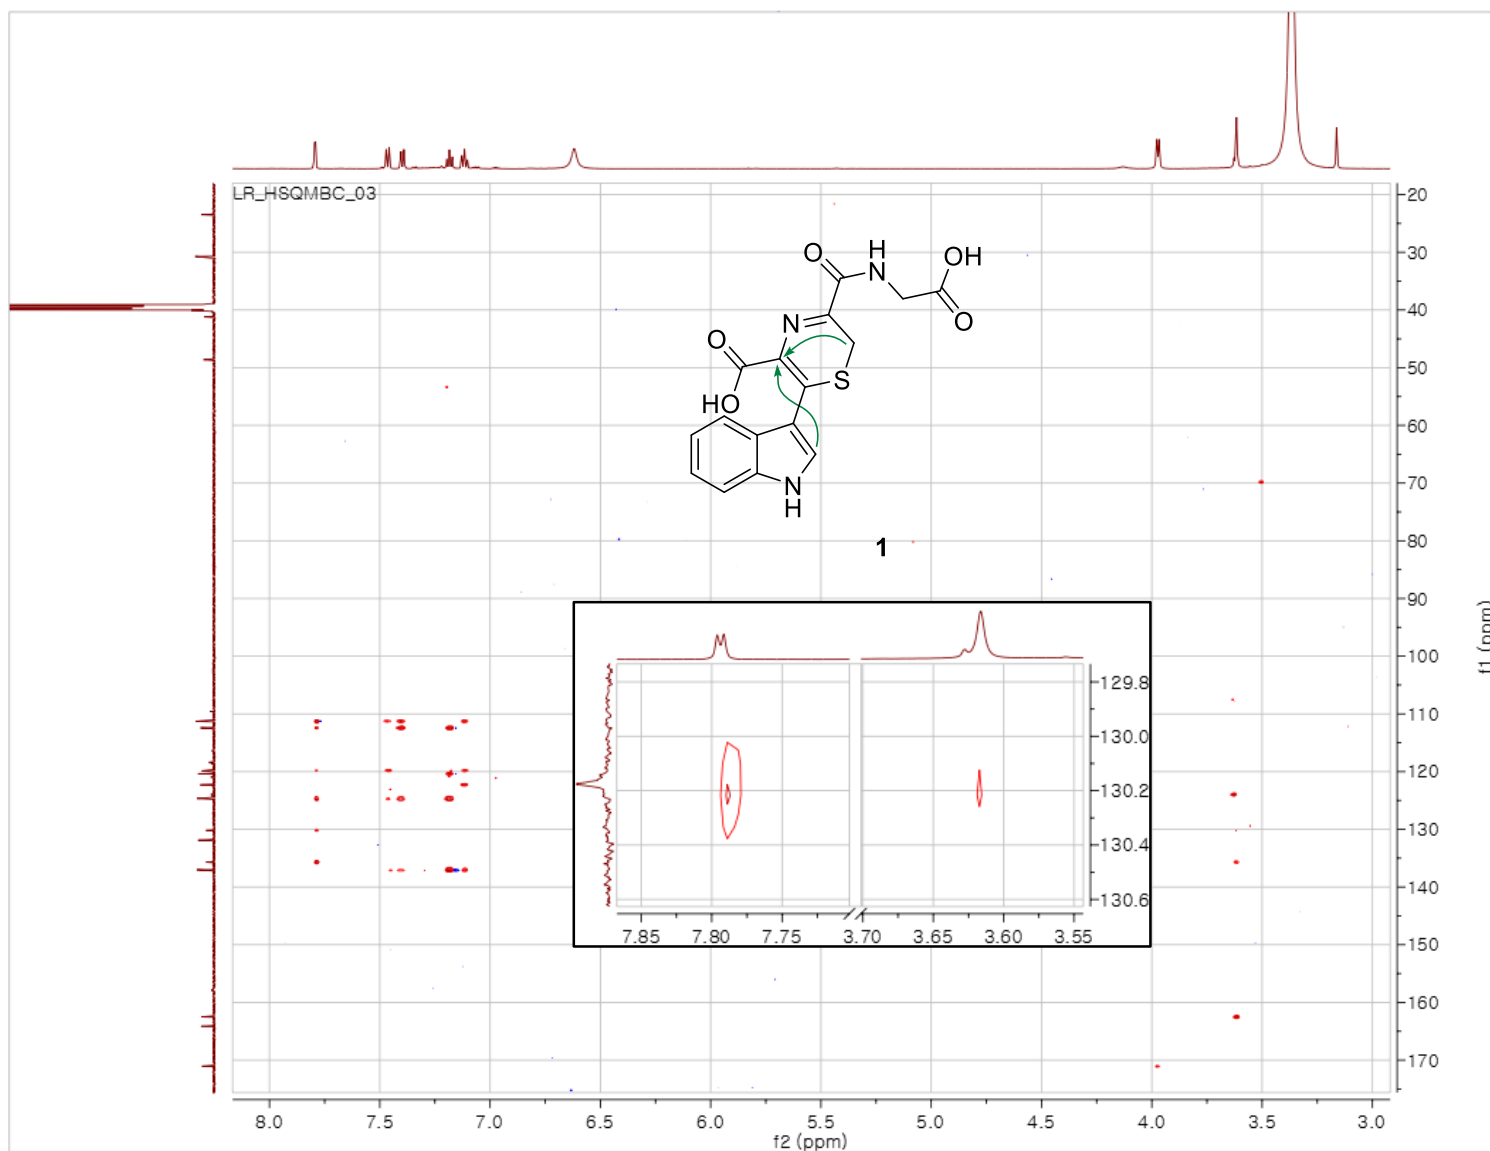

<sup>1</sup>H NMR, 400 MHz, chloroform-*d*

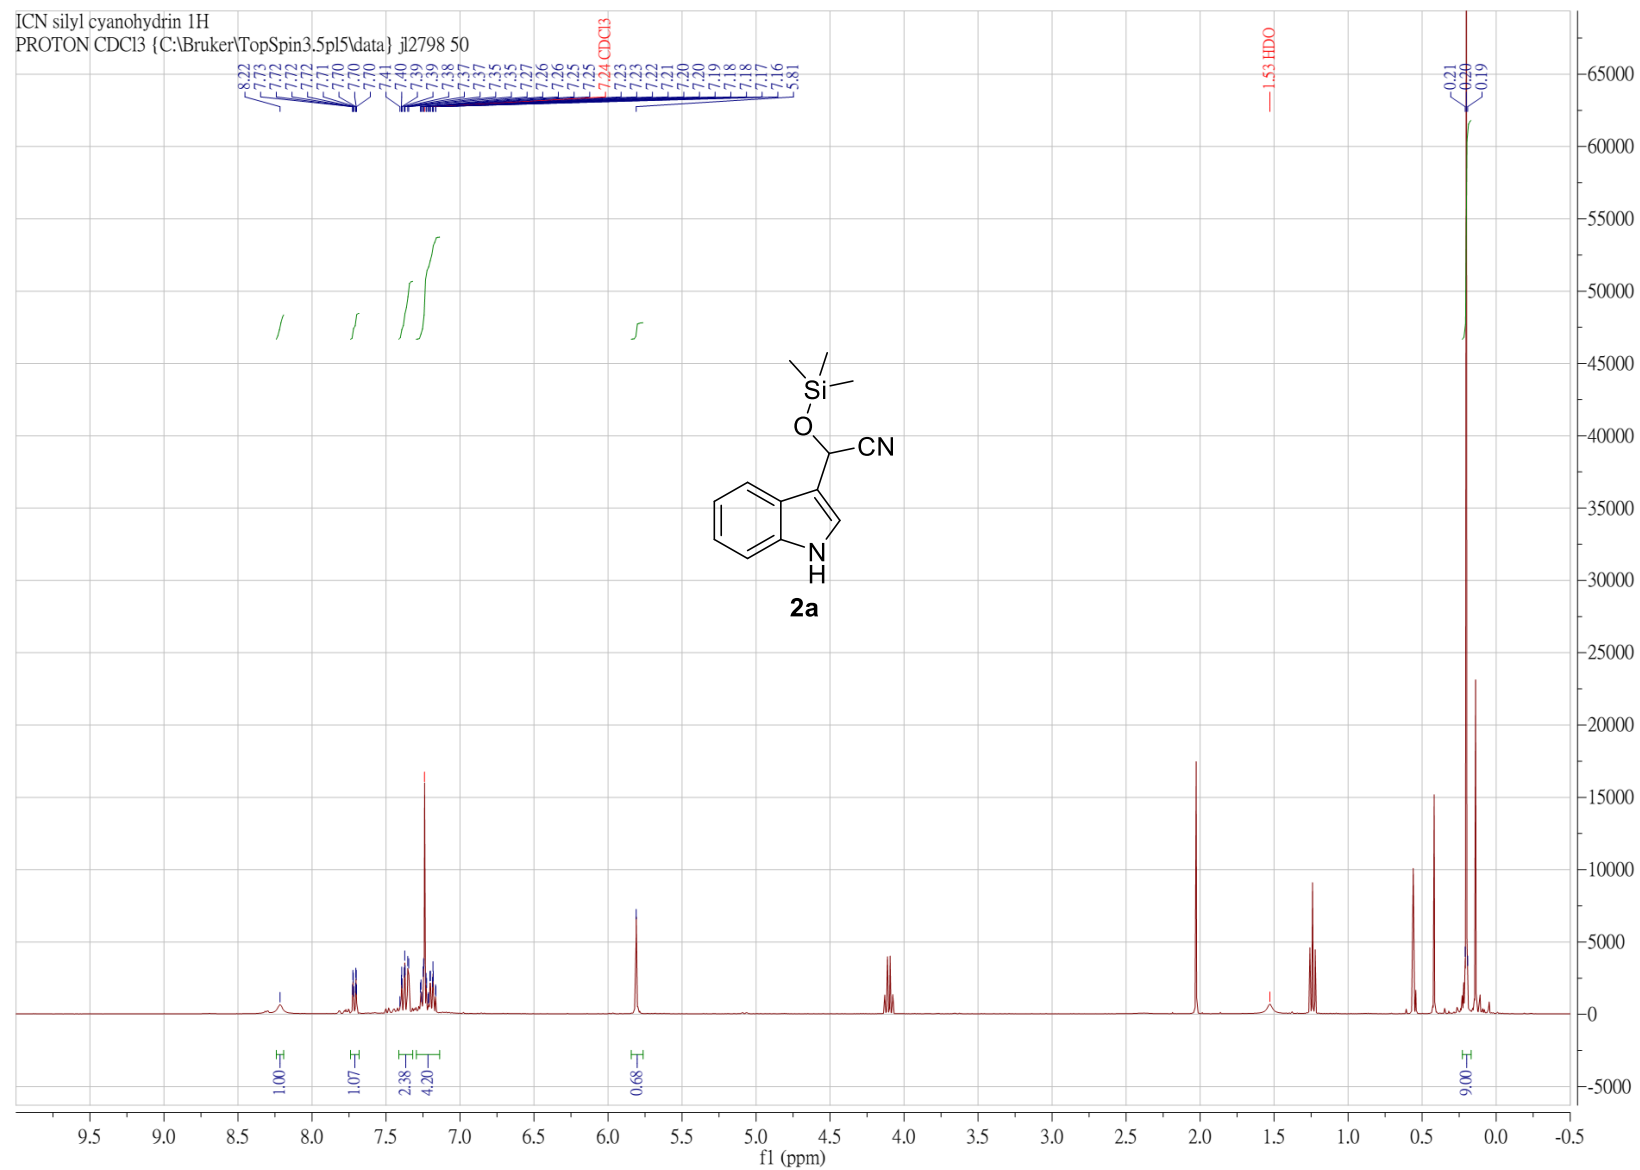



$^1\text{H}$  NMR, 400 MHz,  $\text{DMSO-}d_6$

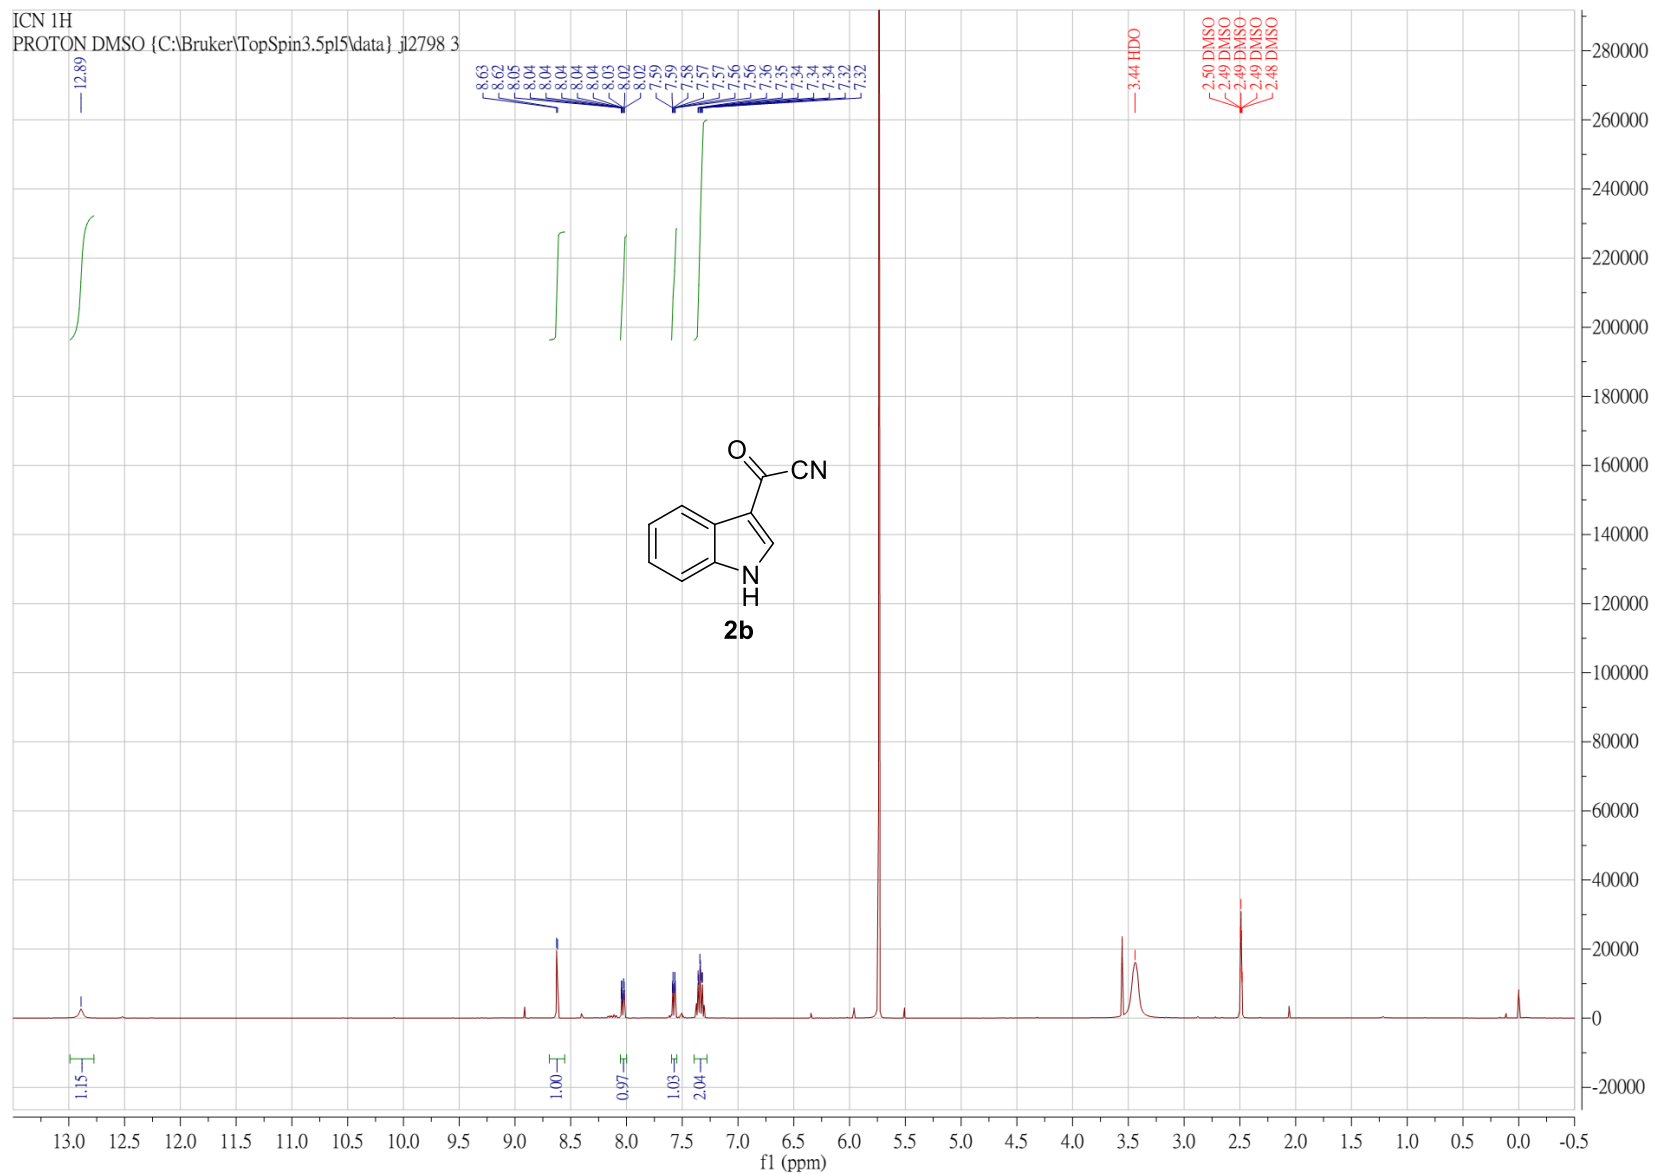

$^1\text{H}$  NMR, 400 MHz, methanol- $d_4$

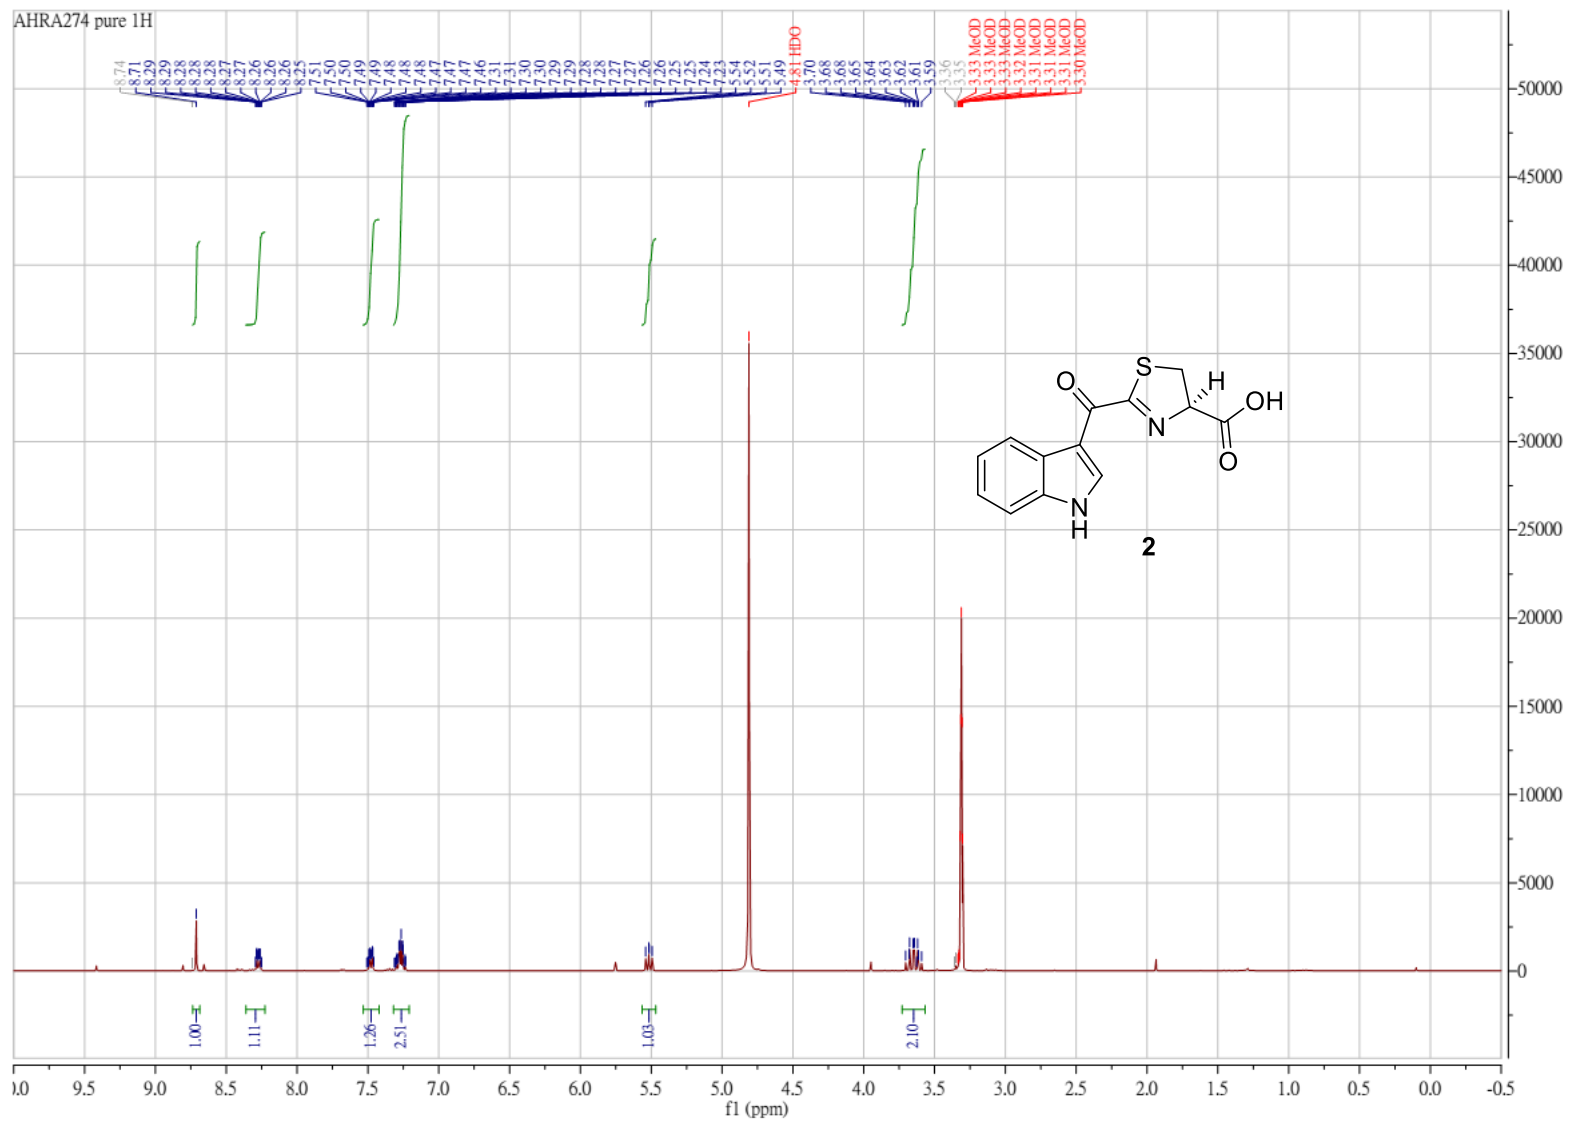

$^1\text{H}$  NMR, 400 MHz,  $\text{DMSO-}d_6$

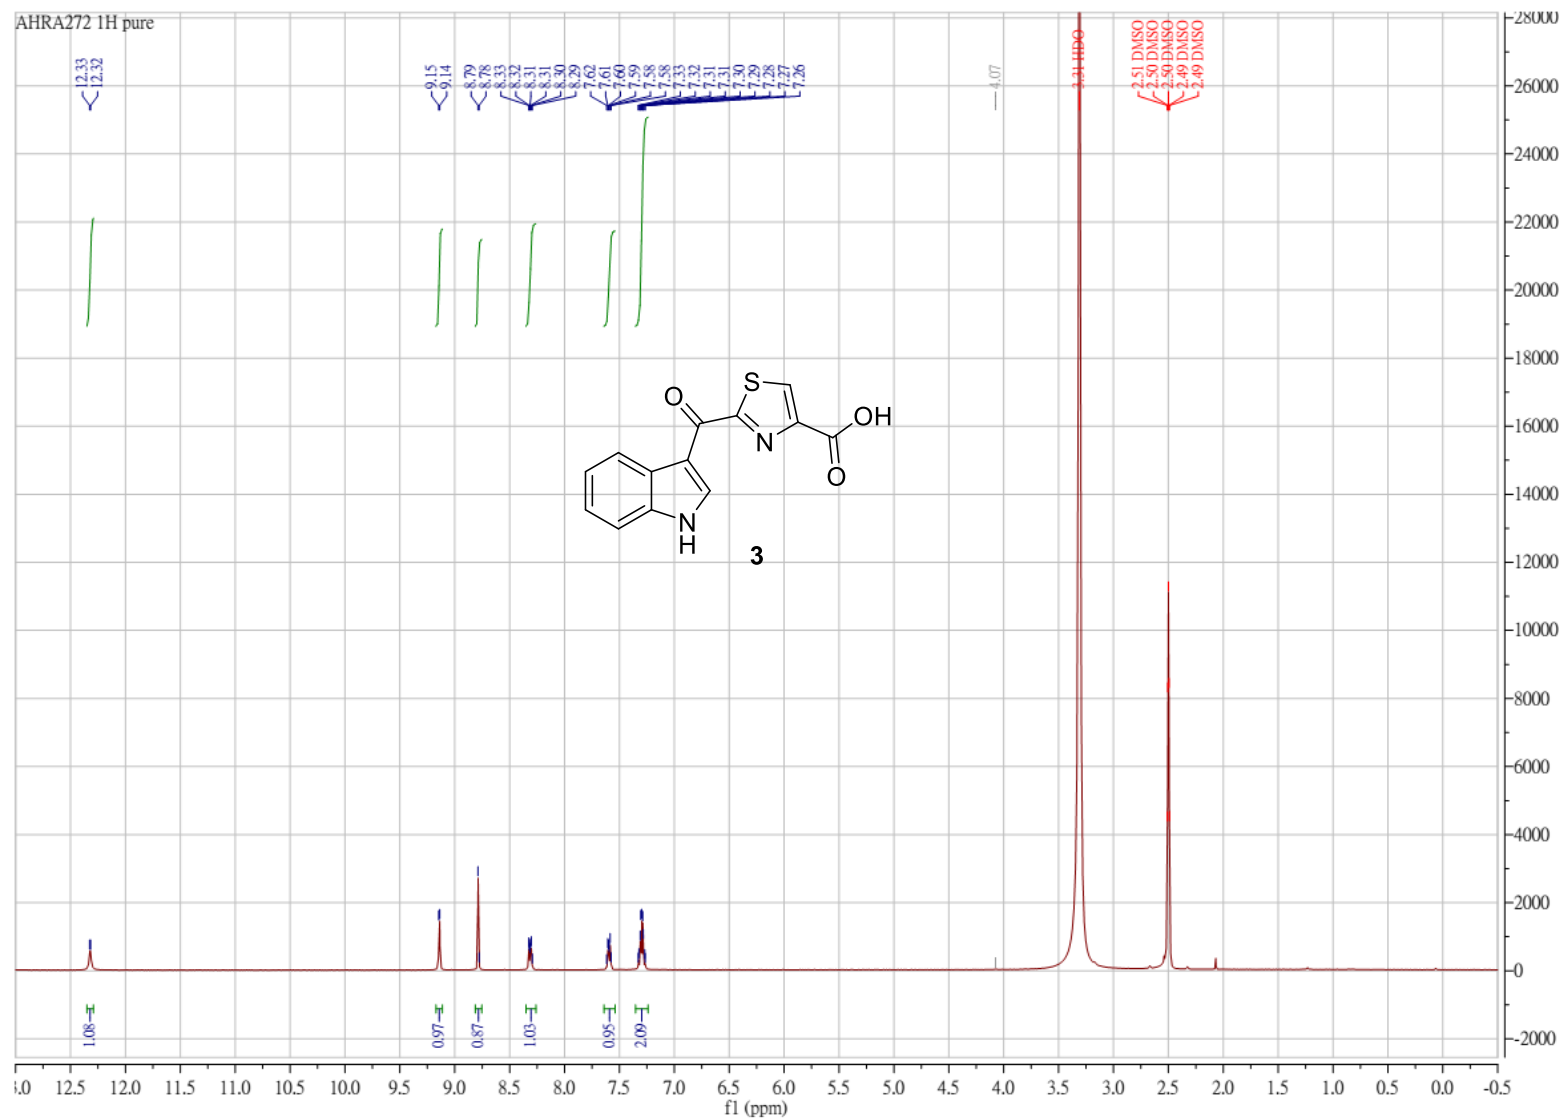

$^1\text{H}$  NMR, 400 MHz, methanol- $d_4$

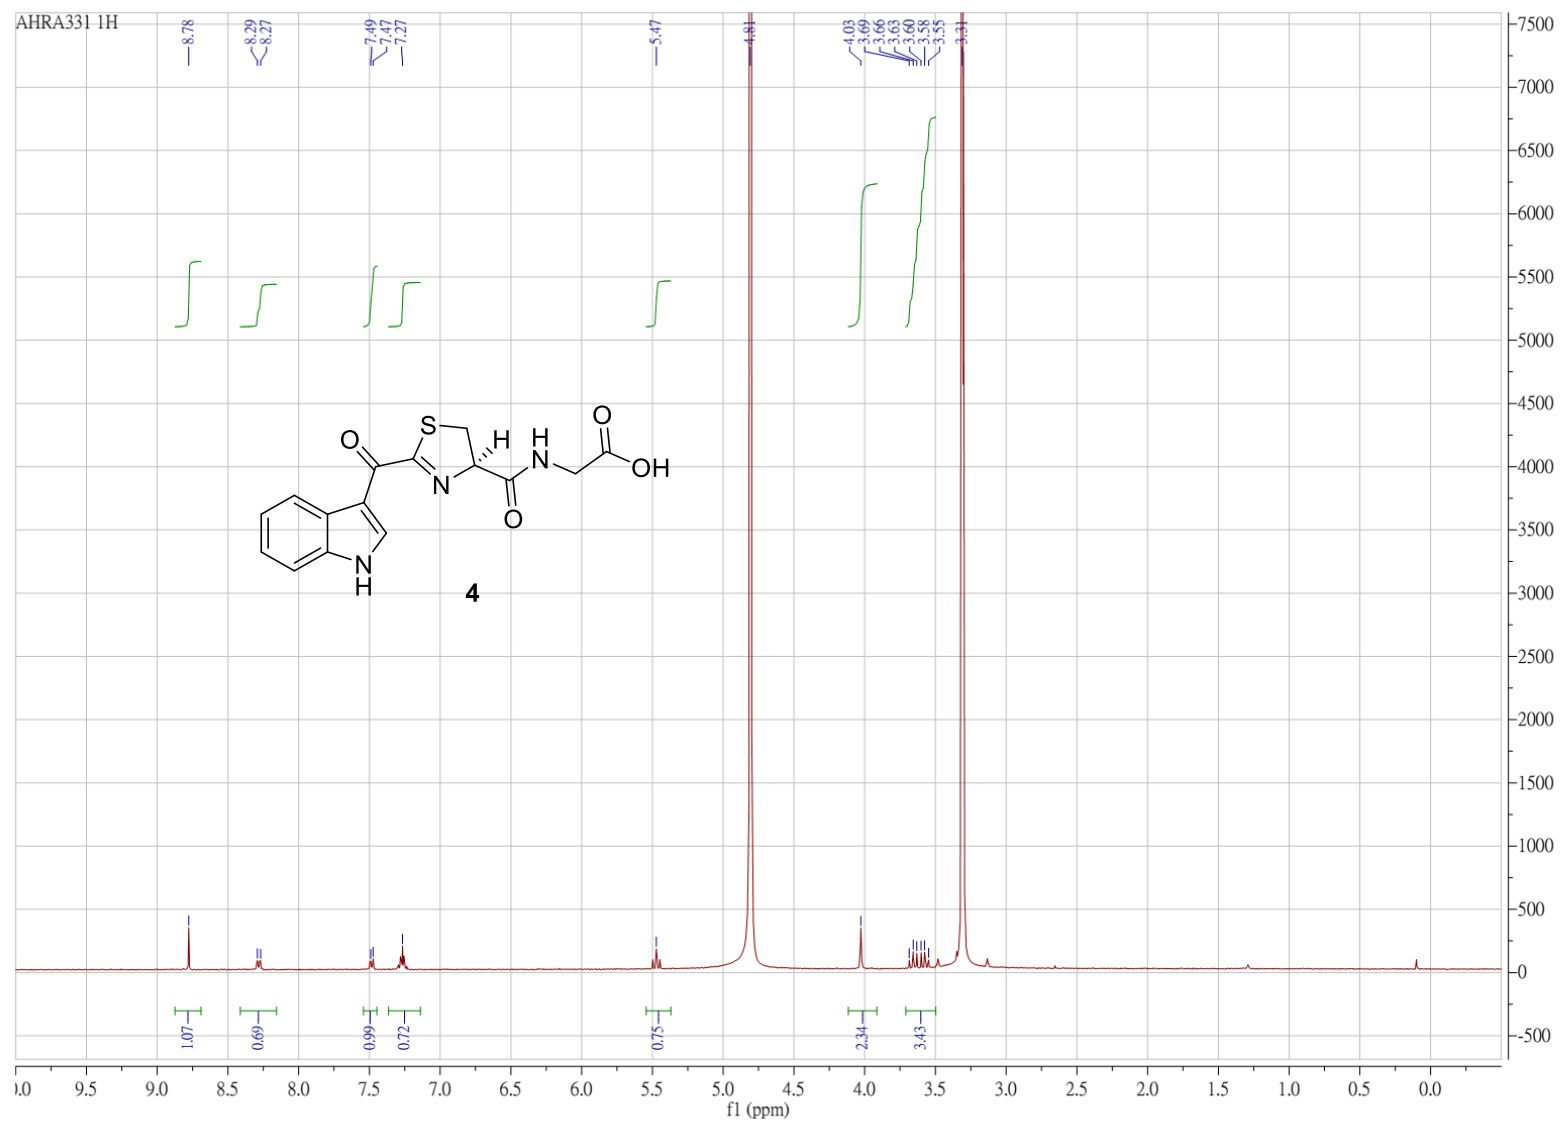

$^1\text{H}$  NMR, 400 MHz,  $\text{DMSO-}d_6$

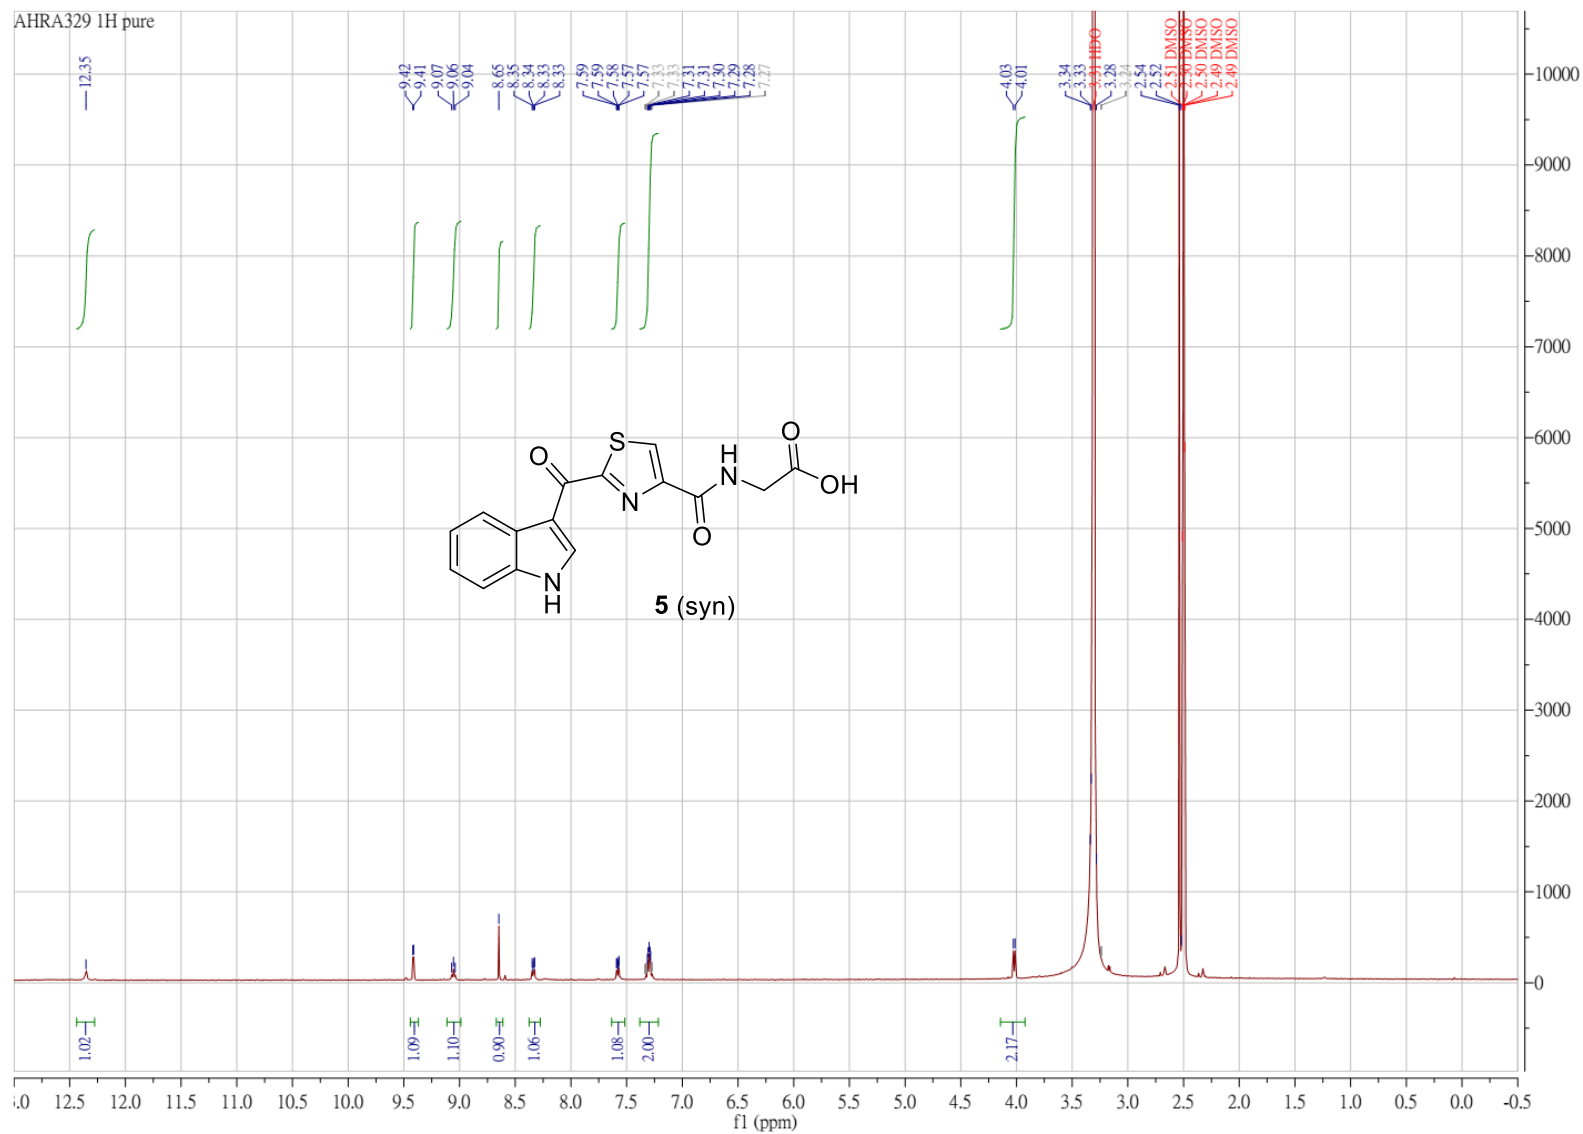

$^1\text{H}$  NMR, 600 MHz, methanol- $d_4$

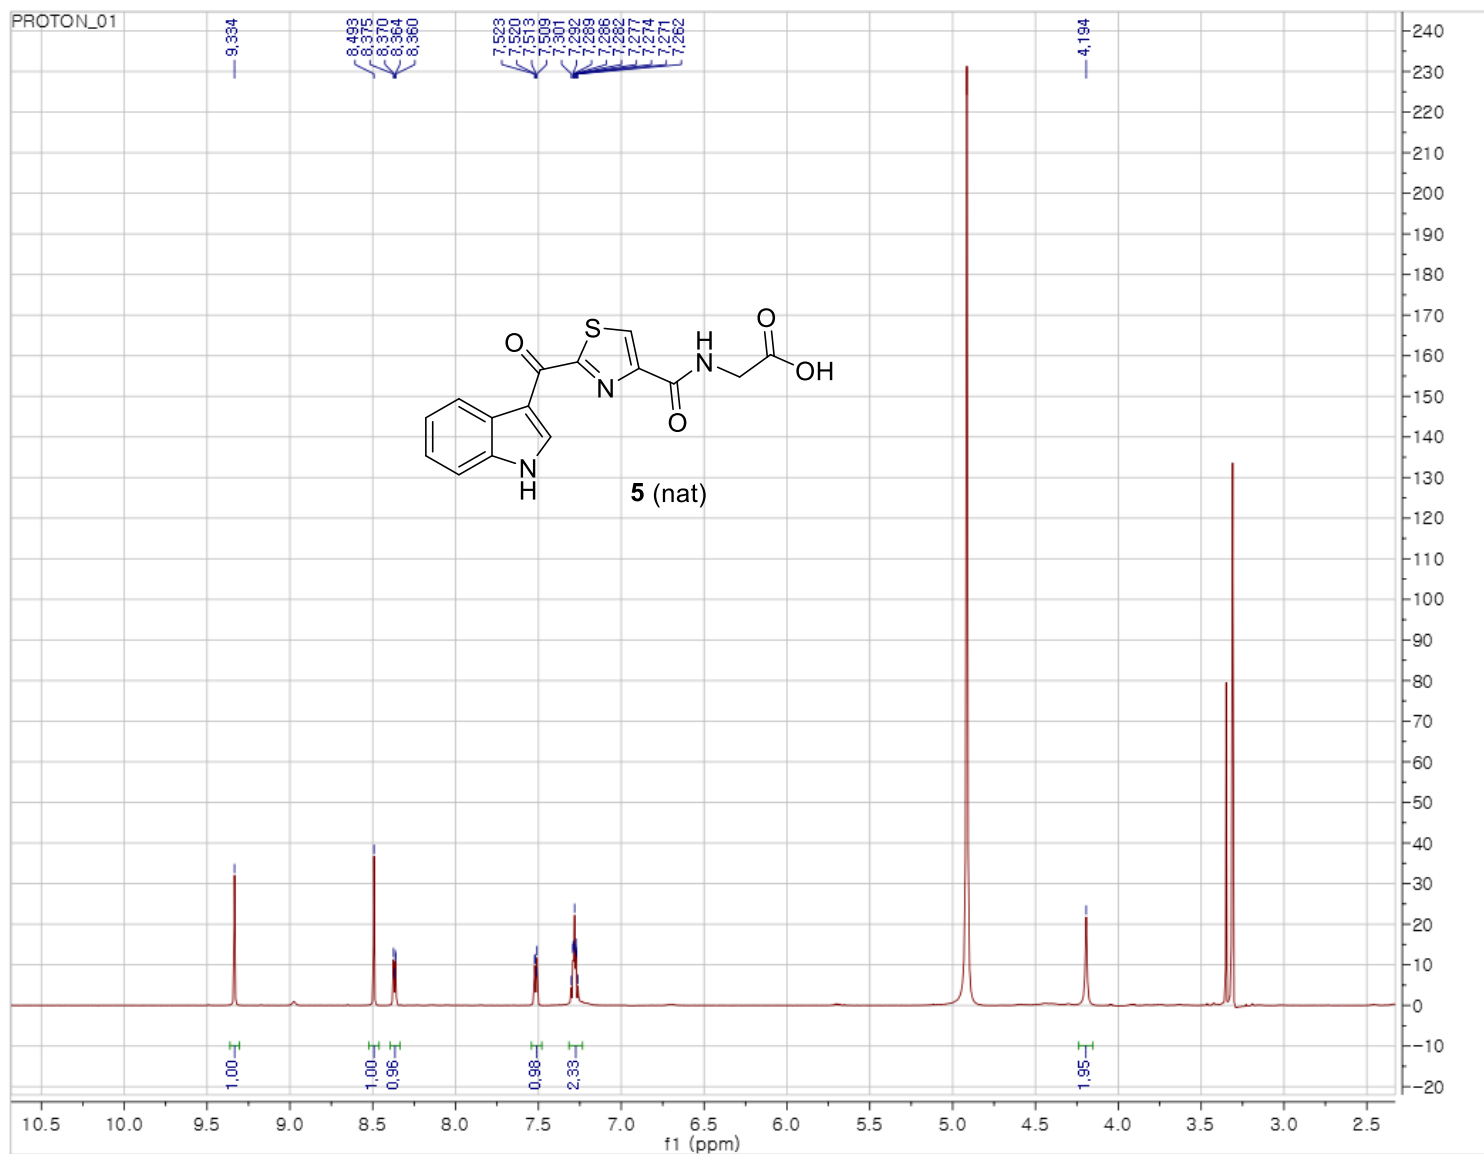

$^1\text{H}$ - $^1\text{H}$  gCOSY, 600 MHz, methanol- $d_4$

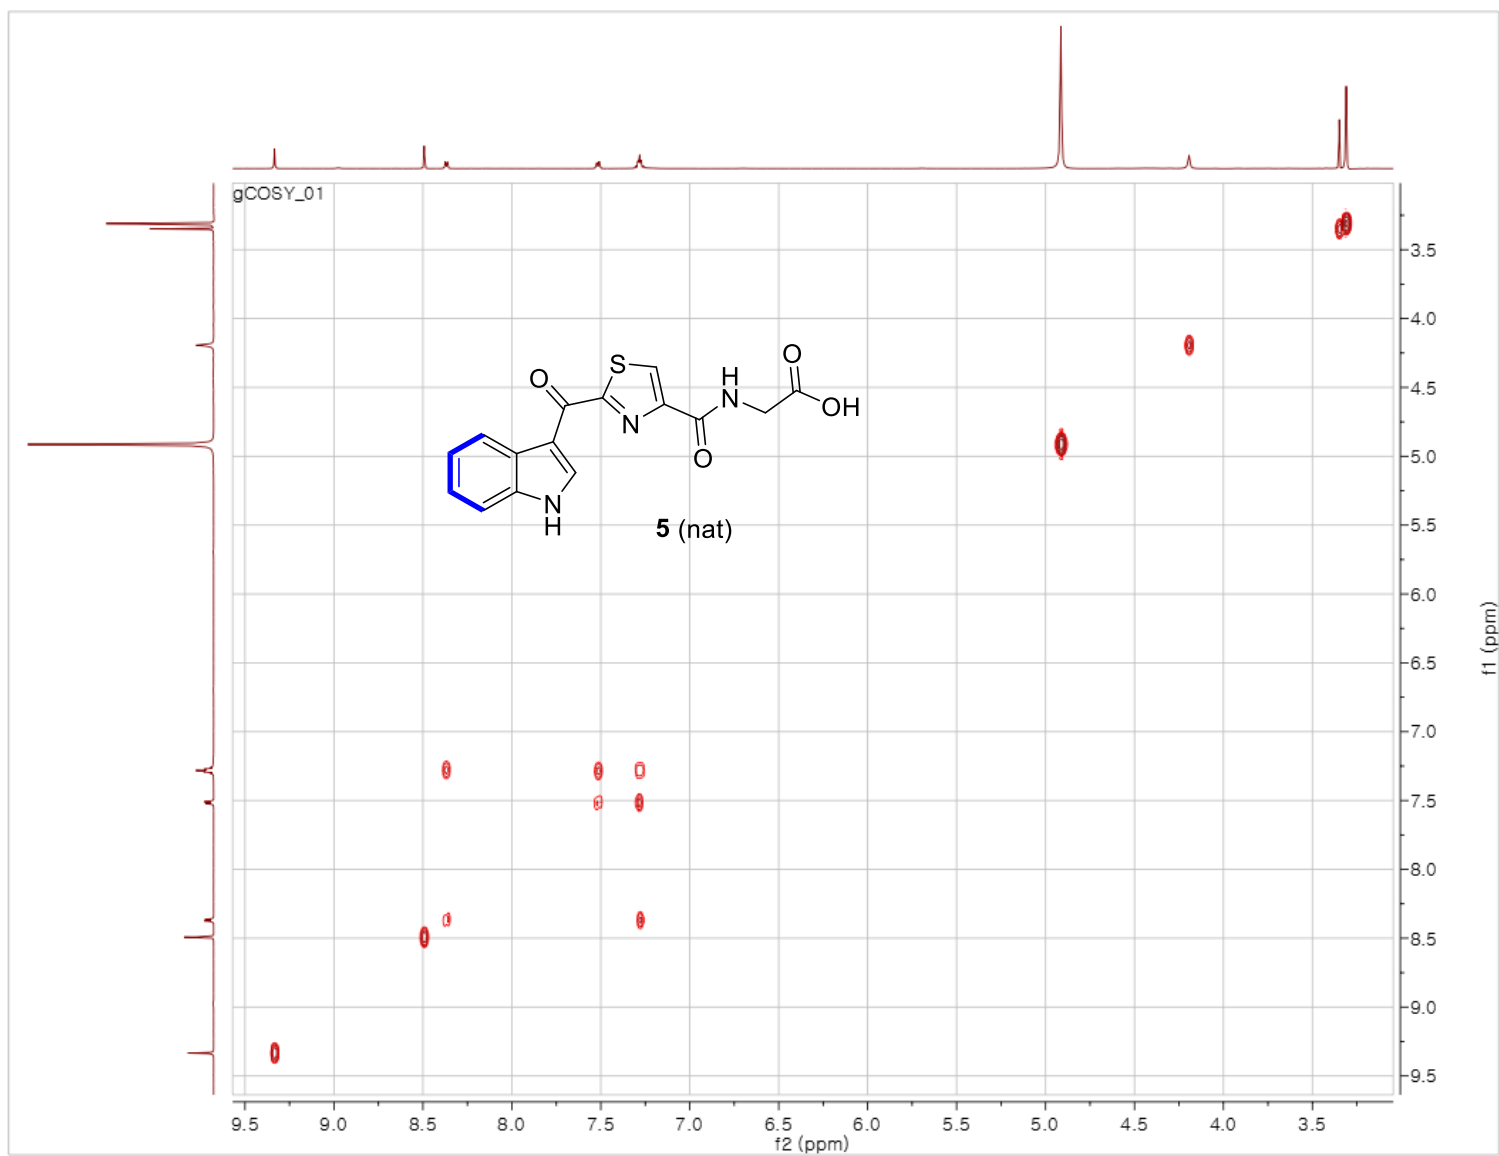

$^1\text{H}$ - $^{13}\text{C}$  gHSQCAD, 600 MHz, methanol- $d_4$

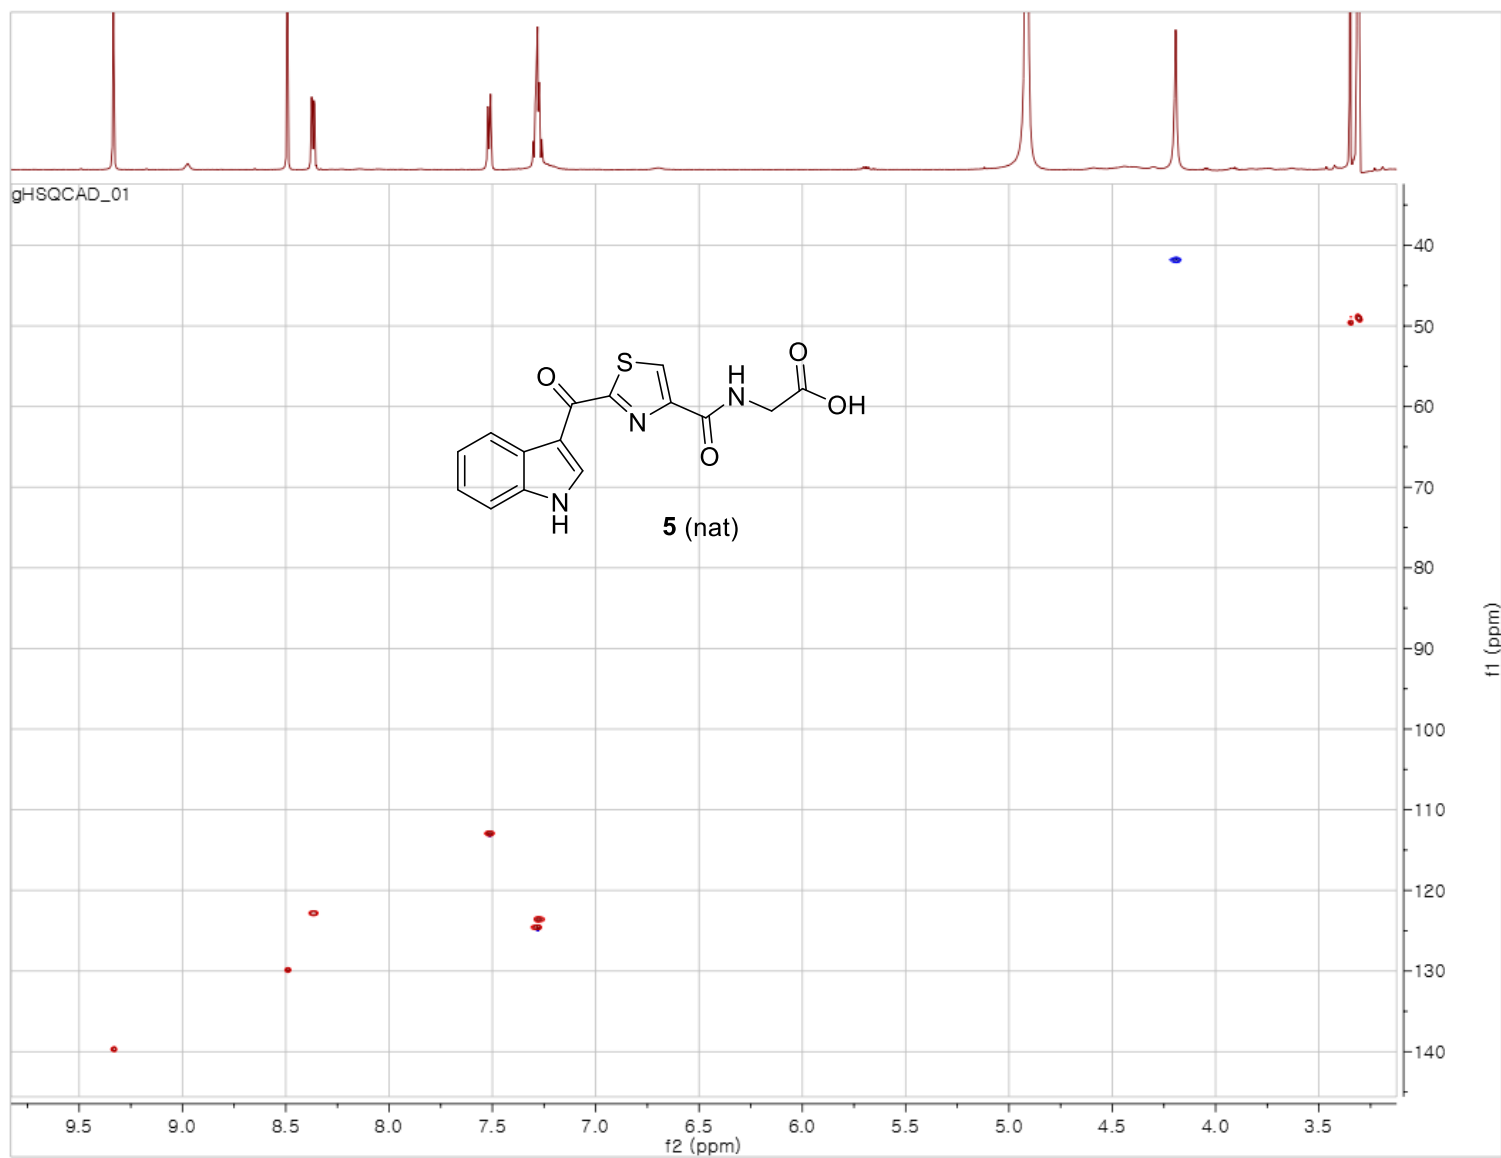



$^1\text{H}$ - $^{13}\text{C}$  gHMBCAD, 600 MHz, methanol- $d_4$

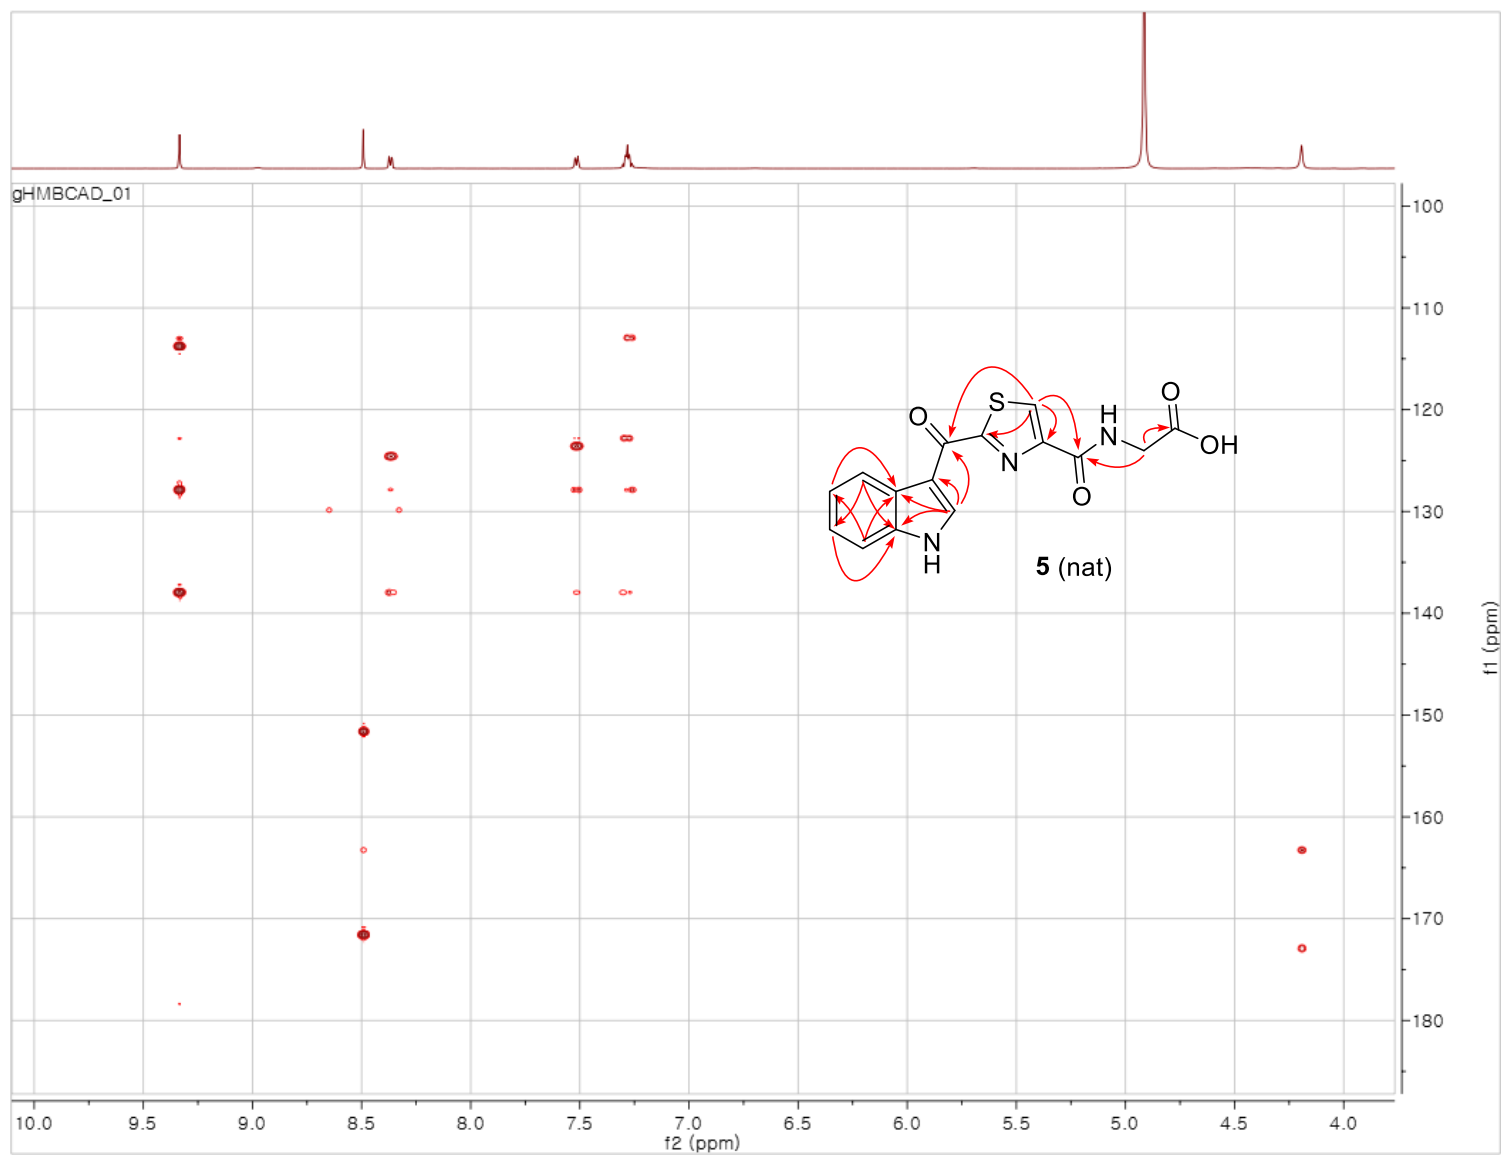

$^1\text{H}$  NMR, 400 MHz, chloroform-*d*

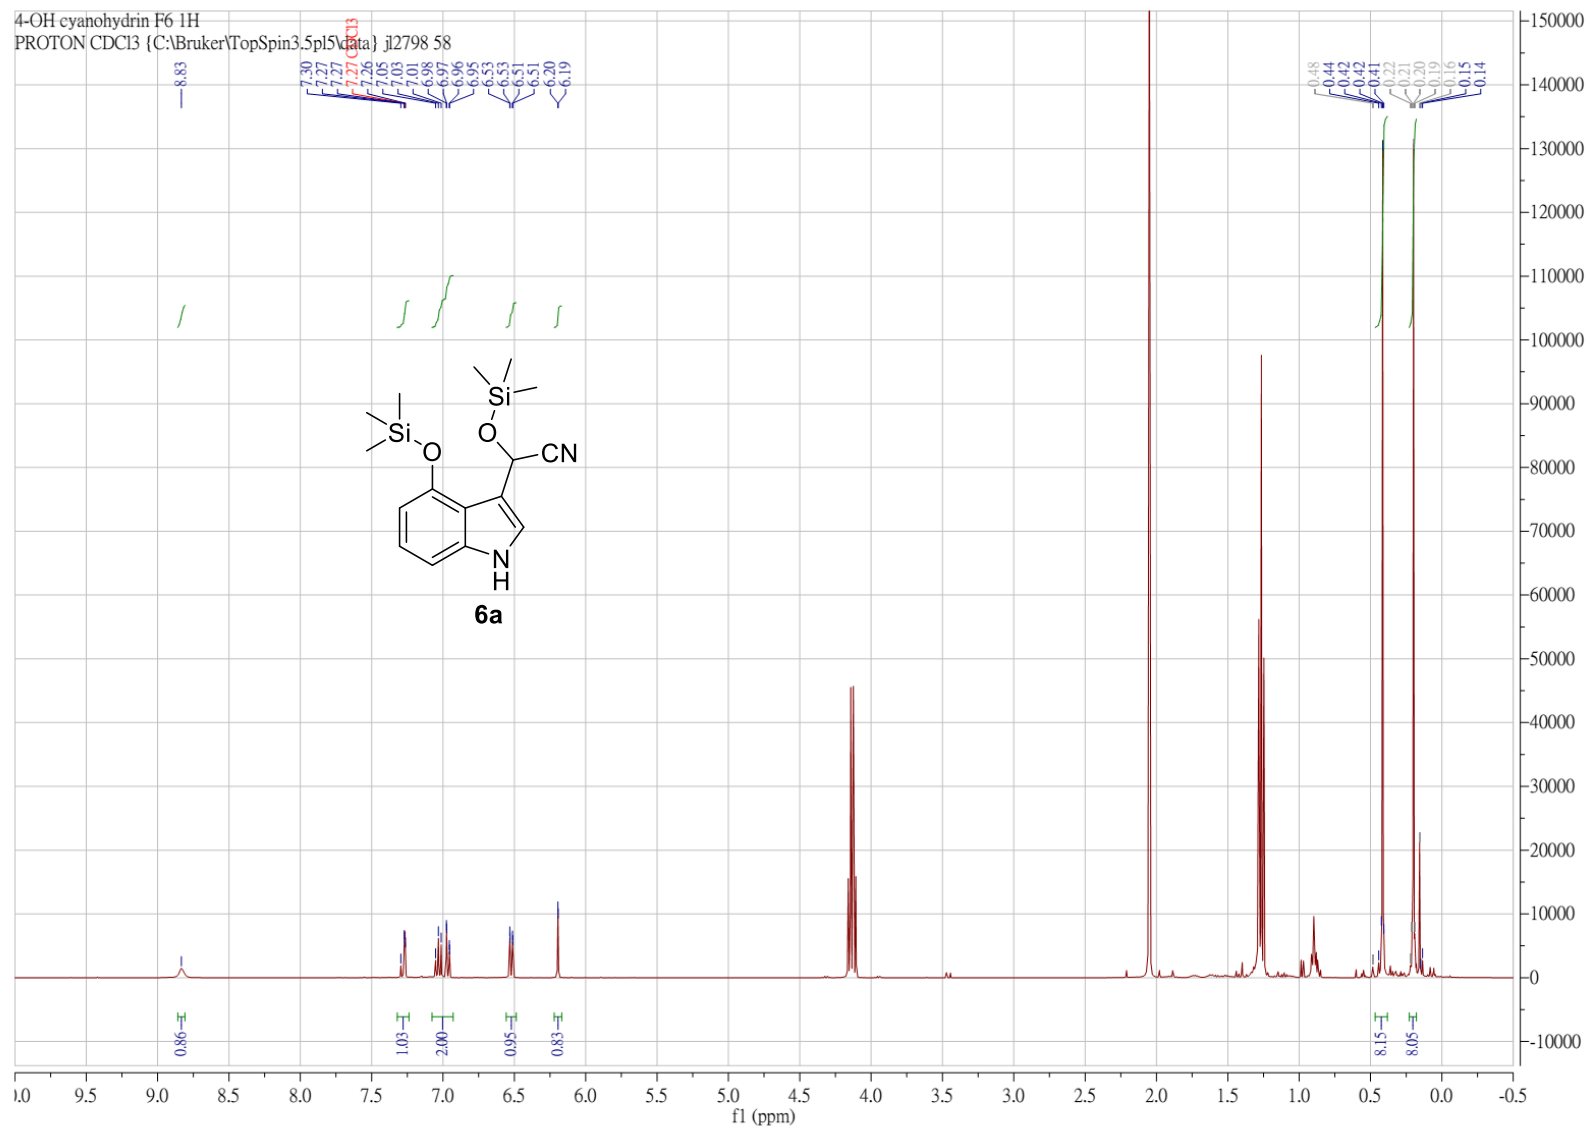

$^1\text{H}$  NMR, 400 MHz,  $\text{DMSO-}d_6$

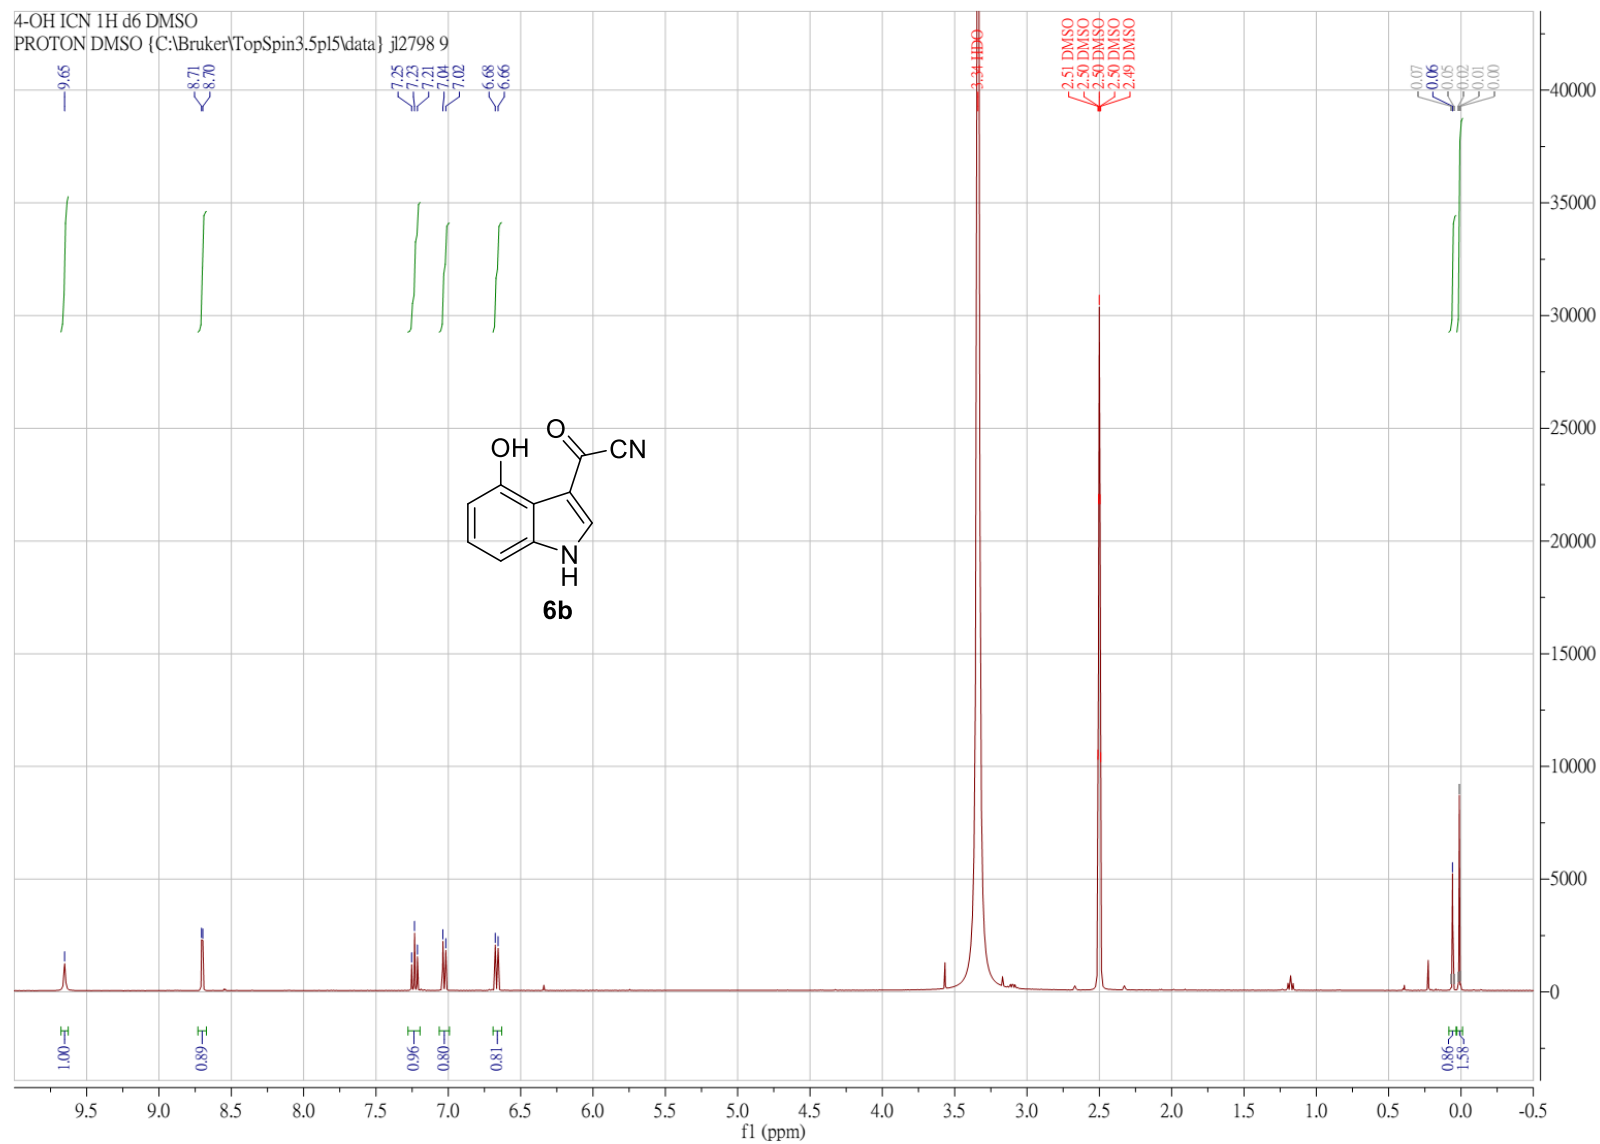

$^1\text{H}$  NMR, 400 MHz, methanol- $d_4$

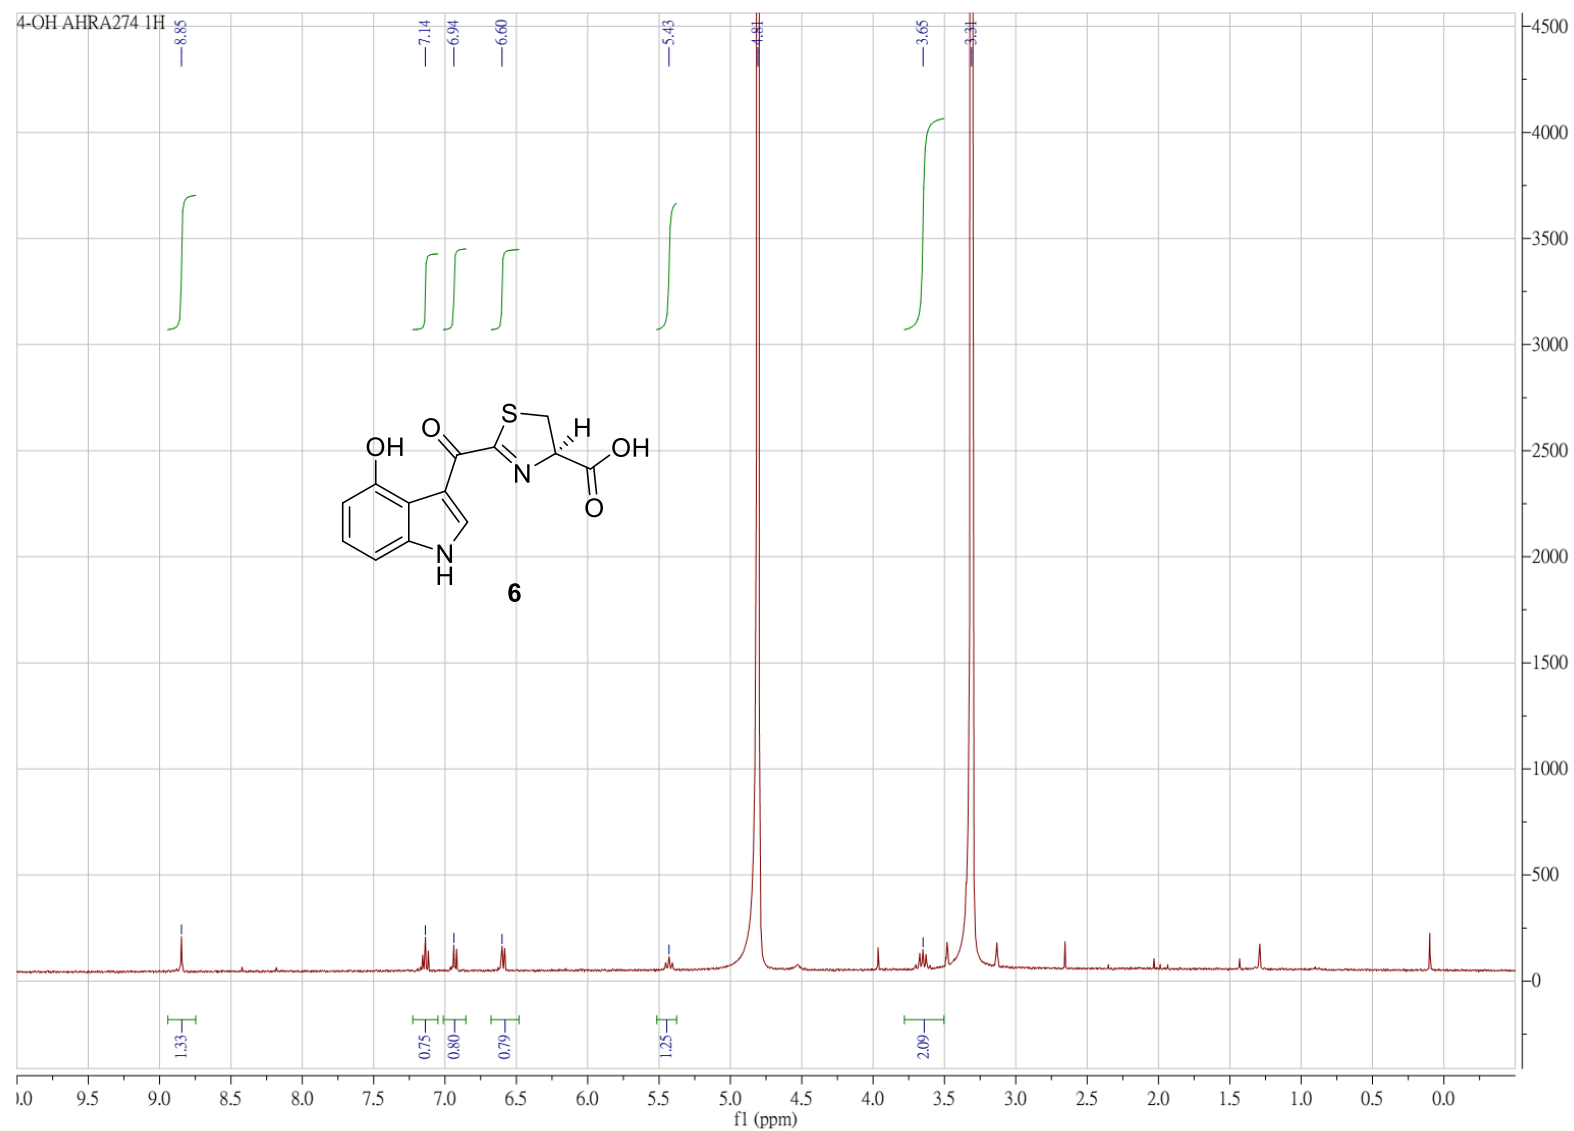

$^1\text{H}$  NMR, 400 MHz, methanol- $d_4$

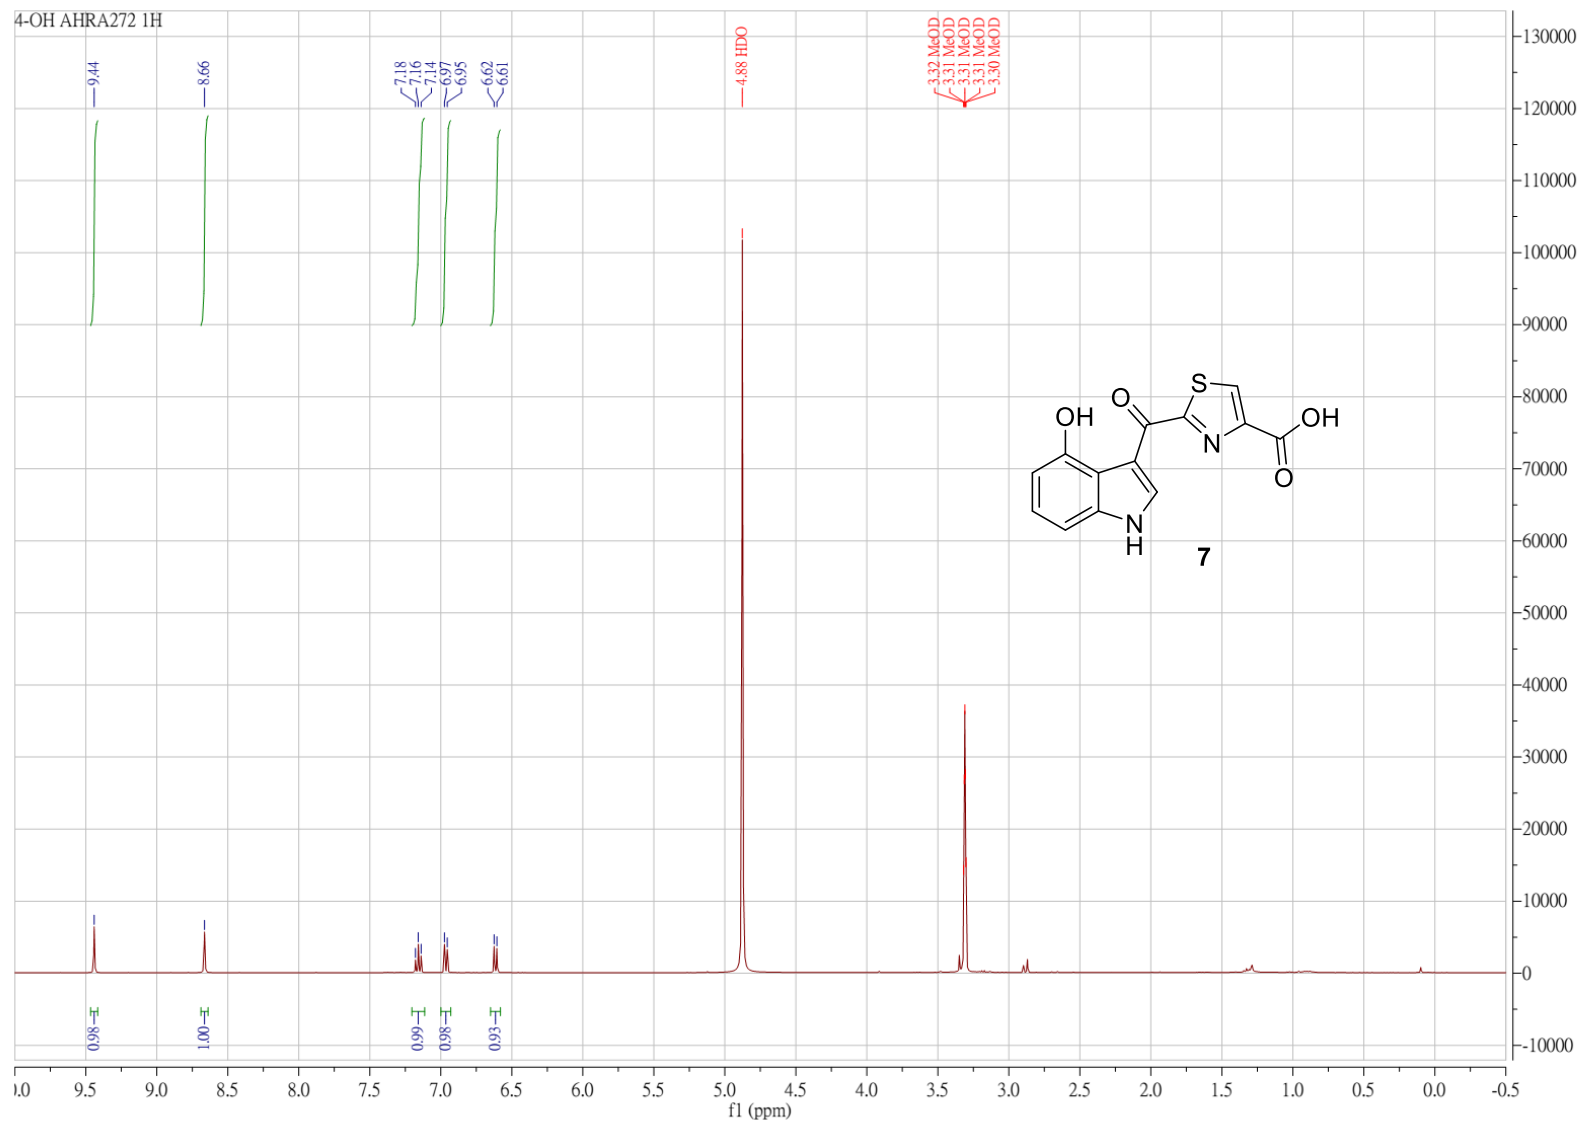

$^1\text{H}$  NMR, 400 MHz, methanol- $d_4$

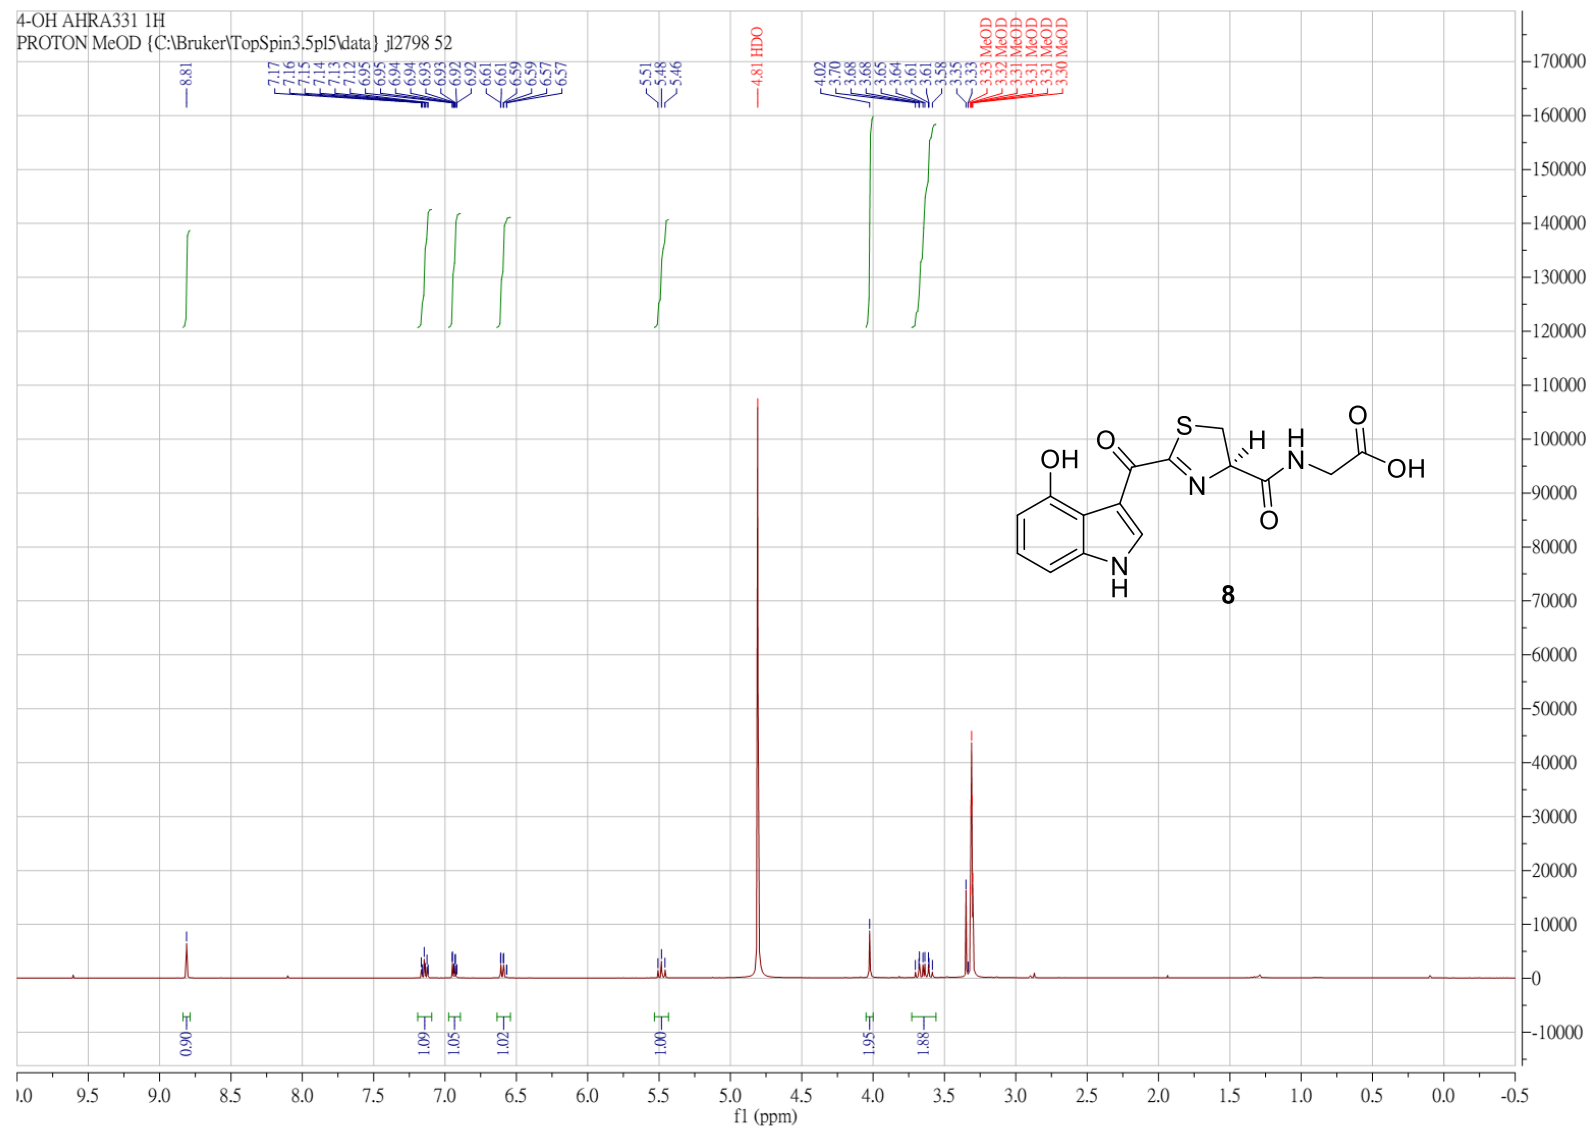

$^1\text{H}$  NMR, 400 MHz, methanol- $d_4$

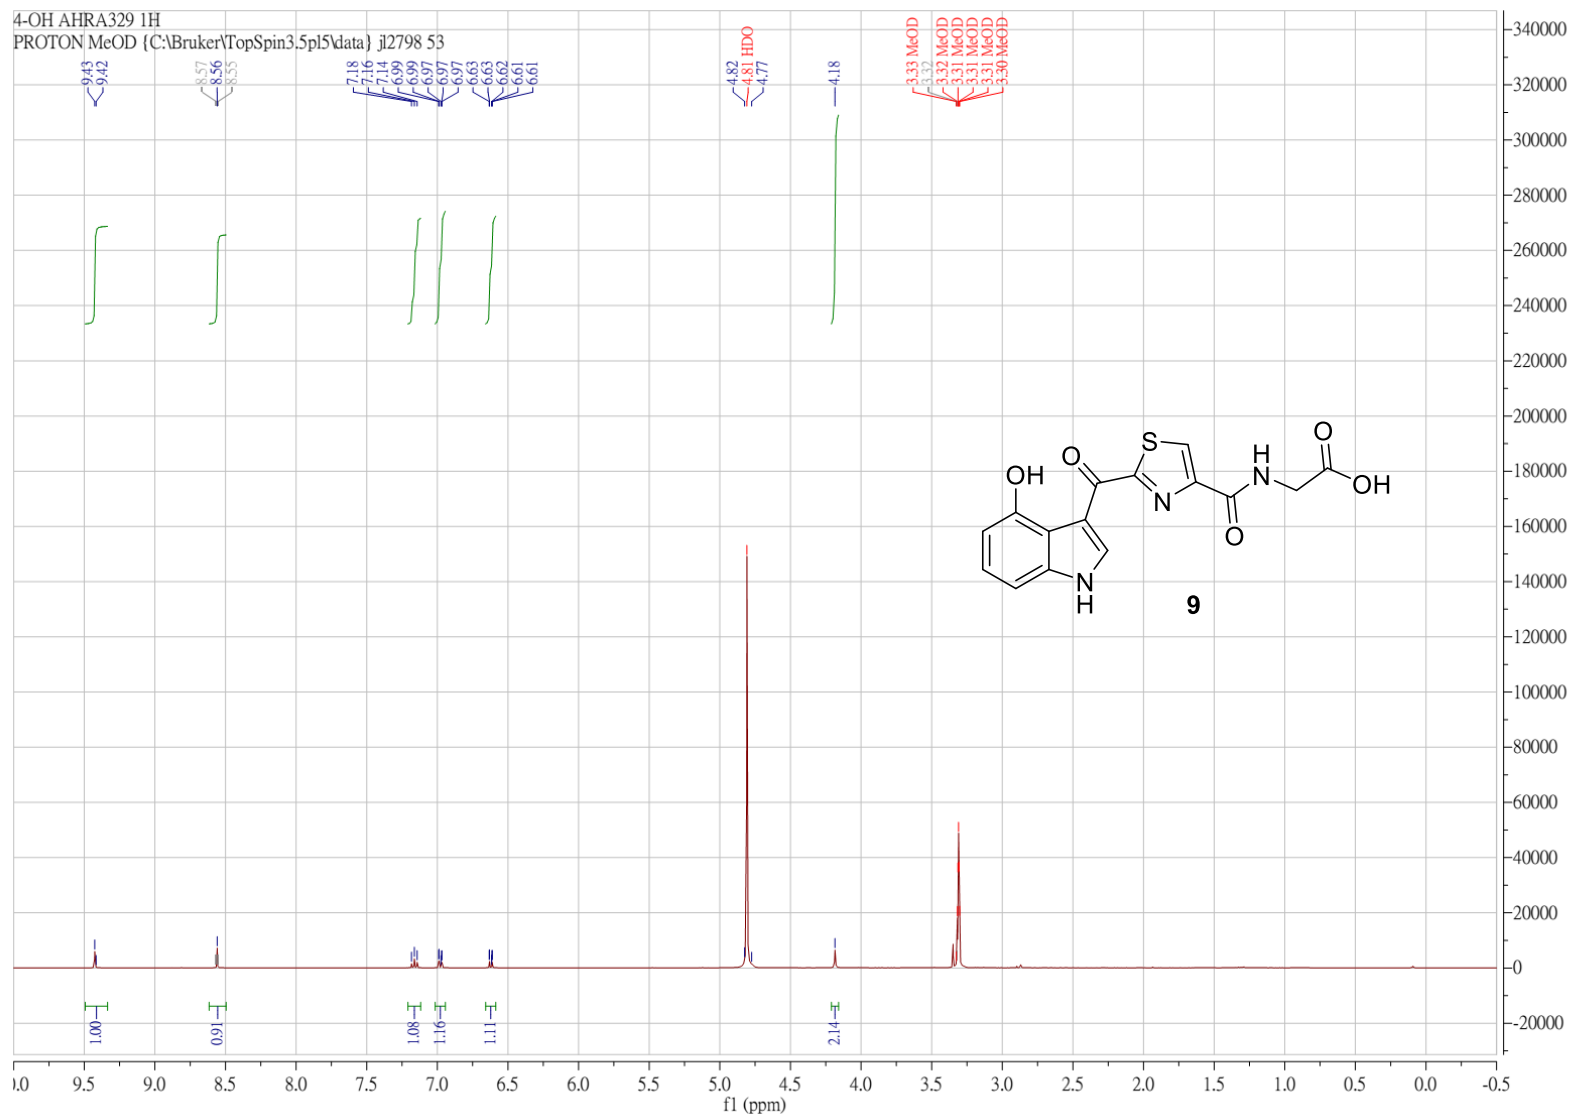

Supplement: NIHMS1580180-supplement-1.pdf [file NIHMS1580180-supplement-1.pdf]
